1 Associations between Afrotropical bats, parasites, and microbial symbionts

2

3 Lutz HL<sup>1,2</sup>, Jackson EW<sup>3</sup>, Webala PW<sup>4</sup>, Babyesiza WS<sup>5</sup>, Kerbis Peterhans JC<sup>2,6</sup>, Demos

4 TC<sup>2</sup>, Patterson BD<sup>2</sup>, Gilbert JA<sup>1,7</sup>

5

6 <sup>1</sup> Department of Surgery, University of Chicago, Chicago, Illinois, USA.

7 <sup>2</sup> Integrative Research Center, Field Museum of Natural History, Chicago, Illinois, USA

8 <sup>3</sup> Department of Microbiology, Cornell University, Ithaca, New York, USA

9 <sup>4</sup> Department of Forestry and Wildlife Management, Maasai Mara University, Narok,

10 Kenya

11 <sup>5</sup> Department of Wildlife Management, Sokoine University of Agriculture, Morogoro,

12 Tanzania

13 <sup>6</sup> Department of Biological Sciences, Roosevelt University, Chicago, Illinois, USA

14 <sup>7</sup> Biosciences Division, Argonne National Laboratory, Argonne, Illinois, USA

15

16 Corresponding author:

17 Holly L. Lutz & Jack A. Gilbert

18 Department of Surgery

19 University of Chicago

20 5851 S. Maryland Avenue

21 Chicago, IL 60637 - 1508

22 hlutz@surgery.bsd.uchicago.edu

23 gilbertjack@uchicago.edu

24 ABSTRACT

25

26 Bats are among the most diverse animals on the planet and harbor numerous bacterial,  
27 viral, and eukaryotic symbionts. The interplay between bacterial community composition  
28 and parasitism in bats is not well understood and may have important implications for  
29 studies of similar systems. Here we present a comprehensive survey of dipteran and  
30 haemosporidian parasites, and characterize the gut, oral, and skin microbiota of  
31 Afrotropical bats. We identify significant correlations between bacterial community  
32 composition of the skin and dipteran ectoparasite prevalence across four major bat  
33 lineages, as well as links between the oral microbiome and malarial parasitism, suggesting  
34 a potential mechanism for host selection and vector-borne disease transmission in bats.  
35 Mirroring recent studies of host-microbiome co-speciation in mammals, we find a weak  
36 correlation between chiropteran phylogenetic distances and bacterial community  
37 dissimilarity across the three anatomical sites, suggesting that host environment is more  
38 important than shared ancestry in shaping the composition of associated bacterial  
39 communities.

40

41

42 Keywords: microbiome, malaria, vector-borne disease, Afrotropics, Chiroptera

43

44

45

46

47 SIGNIFICANCE

48

49 Animals rely on bacterial symbionts for numerous biological functions, such as digestion

50 and immune system development. Increasing evidence suggests that host-associated

51 microbes may play a role in mediating parasite burden. This study is the first to provide a

52 comprehensive survey of bacterial symbionts from multiple anatomical sites across a

53 broad taxonomic range of Afrotropical bats, demonstrating significant associations

54 between the bat microbiome and parasite prevalence. This study provides a framework for

55 future approaches to systems biology of host-symbiont interactions across broad

56 taxonomic scales, which will allow for the recognition of the interdependence between

57 microbial symbionts and vertebrate health in the study of wild organisms and their

58 natural history.

59

60

61

62

63

64

65

66

67

68

69

70 \body

71

## 72 INTRODUCTION

73

74 Humans and other animals rely on bacterial symbionts for numerous biological  
75 functions, such as digestion and immune system development (1, 2). Many studies have  
76 found significant associations between host phylogeny (shared common ancestry) and  
77 bacterial community composition (3, 4), while others have identified spatiotemporal  
78 variables as significant drivers of host-microbe associations over the course of individual  
79 lifespans (5-7). The influence of microbes on their hosts may be context dependent, such  
80 that the presence of a particular microbe may be beneficial under one set of ecological  
81 conditions and harmful under another. Thus, patterns of association between vertebrates  
82 and bacterial symbionts provide a unique lens through which to explore evolutionary and  
83 ecological phenomena.

84 Recognition of the interdependence between microbial symbionts and vertebrate  
85 health has led to a growing paradigm shift in the study of wild organisms and their  
86 natural history. Vertebrate species not only exhibit inherent life history characteristics,  
87 but serve as hosts to myriad bacteria, archaea, viruses, fungi, and eukaryotic organisms  
88 that abound in their environments. Many relationships between eukaryotic parasites and  
89 hosts have ancient origins, and the same may be true for host-microbial associations.  
90 Indeed, it is possible that bacterial symbionts of vertebrate hosts interact with eukaryotic  
91 parasites, viruses, or fungal symbionts in ways that could ultimately shape host evolution  
92 (8). For example, evidence from human and anthropophilic mosquito interactions



93 suggests that the skin microbiome can influence vector feeding preference, thereby  
94 affecting transmission patterns of mosquito-borne pathogens (such as WNV, yellow  
95 fever, dengue, malaria, etc.), and ultimately imposing selective pressures on human  
96 populations - indeed, positive selection of malaria-protective genes can be seen in the  
97 human genome (9). Despite the potential significance of such interactions between hosts,  
98 microbes, and pathogen-transmitting vectors, they have not been well studied in most  
99 wild vertebrate systems.

100         Bats (Mammalia: Chiroptera) are an important system for comparison of the  
101 relative contributions of evolutionary and ecological factors driving host-symbiont  
102 associations. In addition to being one of the most speciose orders of mammals (second  
103 only to the order Rodentia), bats frequently live in large colonies, are long-lived, and  
104 volant, granting them access to a wide geographic range relative to their non-volant  
105 mammalian counterparts. The associations of diverse eukaryotic parasites (e.g. dipteran  
106 insects, haemosporidia, helminths) within numerous bat lineages have been well-  
107 characterized (10-13). Furthermore, bats have received increasing attention due to their  
108 role as putative vectors of human pathogens (*e.g.* Ebola, Marburg, SARS (14, 15)).  
109 Indeed, numerous serological surveys have supported the role of Afrotropical bats as  
110 reservoirs for a number of viruses (16-18). Taken together, these features make bats an  
111 appealing and tractable model for studying the interaction of bacterial symbionts and  
112 non-bacterial parasites and pathogens.

113         In this study, we conduct the first broad-scale study of Afrotropical bat-associated  
114 microbes. We test associations between bacterial community composition in the  
115 gastrointestinal tract, skin, and oral cavities from nine families and nineteen genera of

116 bats. We pair this information with host-parasite associations between bats and  
117 ectoparasites in the superfamily Hippoboscoidea (obligate hematophagous dipteran  
118 insects), and haemosporidian (malarial) parasites putatively vectored by these  
119 hippoboscoid insects. Using a combination of machine learning, network theory, and  
120 negative binomial distribution models, we test the hypothesis that host-associated  
121 bacterial communities predict prevalence of parasitism by obligate dipteran and malarial  
122 parasites.

123

## 124 RESULTS

125

### 126 1) Ectoparasite and malarial parasite prevalence among Afrotropical bats

127

128         Sampling was conducted across 20 sites in Kenya and Uganda from July–August  
129 of 2016. Sites ranged from sea level to ~2500m in elevation (Fig. 1; Table S1). We  
130 collected gut, oral, and skin samples for bacterial community characterization from a total  
131 of 495 individual bats, comprising 9 families, 19 genera, and 28 recognized species. Bat  
132 families with the greatest representation included Hipposideridae ( $n = 80$ ), Miniopteridae  
133 ( $n = 116$ ), Rhinolophidae ( $n = 88$ ), and Pteropodidae ( $n = 106$ ). All host and parasite  
134 vouchers are accessioned at the Field Museum of Natural History (Chicago, IL, USA)  
135 (Table S2). Miniopterid bats experienced the highest prevalence of both ectoparasitism  
136 (*M. minor*, 89%) and malarial parasitism (*M. minor*, 67%) (Table 1). Bats with similarly  
137 high ectoparasite prevalence at the host species level included *Rhinolophus eloquens* (79%

138 prevalence), *Stenonycteris lanosus* (62%), and *Triaenops afer* (60%). Unlike miniopterid  
139 bats, these bat species did not harbor any detectable malarial parasites (Table 1).

140

141 2) Bacterial richness of bat skin drastically exceeds that of gut or oral communities

142

143       Across all samples, 51,136 Exact Sequence Variants (ESVs) were identified using  
144 Deblur (19). Gut microbial communities exhibited the lowest overall diversity (9,804  
145 ESVs), followed by oral (13,629 ESVs), and skin (46,904 ESVs), the latter being  
146 significantly greater than gut or oral ( $p < 2.2e-16$ , Kruskal-Wallis; Bonferroni corrected  
147  $p$ -value  $p < 1e-113$ , Dunn's test) (Fig. 2A). Aggregate mean observed ESVs by host  
148 genus were 70, 93, and 531 for gut, oral, and skin samples, respectively (Table 2). As with  
149 observed ESV richness counts, the Shannon index of bat skin microbial communities was  
150 significantly greater than that of either gut or oral microbiota ( $p < 2.2e-16$ , Kruskal-  
151 Wallis; Bonferroni corrected  $p$ -value  $p < 1e-119$ , Dunn's Test) (Fig. 2B). Based on  
152 weighted UniFrac distances, measures of intraspecific beta dispersion revealed a  
153 continuum of dissimilarities across all host species (Fig. 3). Mean beta dispersion among  
154 anatomical sites differed significantly ( $p < 1.2e-7$ , Kruskal-Wallis; Bonferroni corrected  
155  $p$ -value  $p < 0.01$ , Dunn's Test). Measures of intraspecific beta dispersion among  
156 unweighted UniFrac and Bray-Curtis distances also showed a continuum of  
157 dissimilarities across host species, and exhibited significant differences in mean beta  
158 dispersion across anatomical sites (Fig. S1).

159

160 3) Microbial communities significantly correlate with geographic locality, anatomical site,  
161 and host taxonomy, but not host phylogeny

162

163 Permutational analysis of variance (PERMANOVA) identified geographic  
164 locality, host taxonomy, and anatomical sampling site (gut, oral, skin) as significant  
165 factors explaining variation in three independent measures of microbial beta diversity  
166 (Bray-Curtis, unweighted UniFrac, and weighted UniFrac) ( $p < 0.001$ , ADONIS) (Table  
167 4). Secondary analysis of sites by elevation revealed that bats at higher elevations tended  
168 to host increased alpha diversity across gut, oral, and skin microbiomes ( $p < 2e-16$ , linear  
169 regression) (Fig. S2). In general, gut microbiota were dominated by Proteobacteria  
170 (Enterobacteraceae) and Firmicutes (Bacillaceae). Oral microbiota were dominated by  
171 Proteobacteria (Neisseriaceae, Pasteurellaceae). The oral microbiota of several insect bat  
172 families (Miniopteridae, Nycteridae, Rhinolophidae) were enriched for Firmicutes in the  
173 Mycoplasmataceae family, while the oral microbiota of fruit bats (Pteropodidae) were  
174 enriched for Firmicutes in the Streptococacceae family. Similar to gut and oral microbiota,  
175 skin also showed a high relative abundance of Proteobacteria (Moraxellaceae,  
176 Enterobacteraceae) and Firmicutes (Bacillaceae), with a pronounced increase in relative  
177 abundance of Actinobacteria and Bacteroidetes (Fig. 4).

178 Linear regression analyses of host phylogenetic distances and microbial  
179 community dissimilarity (unweighted UniFrac (uf) and weighted UniFrac (wuf)  
180 distances) revealed weak correlations for gut (uf:  $R^2 = 0.013$ ,  $p < 0.05$ ; wuf:  $R^2 = 0.002$ ,  $p$   
181  $= 0.752$ ;  $R^2 = 0.0007$ ,  $p = 0.2643$ ;  $R^2 = 0.0015$ ,  $p = 0.522$ ), oral ( $R^2 = 0.009$ ;  $p < 0.05$ ), and  
182 skin ( $R^2 = 0.024$ ;  $p < 0.005$ ) microbiota and host evolutionary relatedness (Fig. S3).

183

184 4) The microbiome is associated with parasitism in African bats

185

186 To test for significant associations between bacterial communities and eukaryotic  
187 parasites (obligate ectoparasitic dipteran insects, and obligate endoparasitic malarial  
188 parasites), we employed a combination of machine learning techniques, network analyses,  
189 and negative binomial distribution models (see methods). PERMANOVA analysis  
190 identified ectoparasite status and malarial infection status as significant predictors of  
191 bacterial beta diversity dissimilarity among skin and oral microbiota, respectively ( $p <$   
192  $0.001$ , ADONIS). Tests of three independent measures of beta diversity (weighted  
193 UniFrac, unweighted UniFrac, and Bray-Curtis) produced congruent results, with the  
194 exception of oral microbiome, which was not significantly predictive of malarial infection  
195 based on unweighted UniFrac analysis (Table 3).

196 Supervised machine learning analyses (random forests; see methods) produced  
197 models that could classify the anatomical source of microbial communities and the host  
198 genus of gut, oral, and skin microbial samples with reasonable accuracy (ratio of baseline  
199 to observed classification error  $\geq 2$ ; *i.e.* random forest models performed at least twice as  
200 well as random). Random forest models also performed well when classifying ectoparasite  
201 status based on skin bacterial community composition, but less well for classification of  
202 malarial status based on oral bacterial community composition (Table 5).

203 Following the application of statistical and machine learning approaches, we  
204 employed network analyses to characterize the co-occurrence topology of microbial  
205 communities (in terms of the relative abundance of co-occurring ESVs) across the skin

206 microbiota of our four most well-sampled bat families (Hipposideridae ( $n = 80$ ),  
207 Miniopteridae ( $n = 116$ ), Rhinolophida ( $n = 88$ ), and Pteropodidae ( $n = 106$ )). Network  
208 analyses produced strikingly consistent results, revealing a significant decrease in cluster  
209 size ( $p < 0.05$ , Mann-Whitney-Wilcoxon rank sum test) and median node degree ( $p <$   
210  $0.05$ ,  $t$  test), as well as reduced network connectivity for parasitized bats from three of the  
211 four bat families examined (Fig. 5; Fig. S4).

212

213 5) Bacterial taxa on skin correlated with presence or absence of obligate dipteran

214 ectoparasites

215

216 Negative binomial distribution (*e.g.* DESeq) models applied to skin microbiota in  
217 four well-sampled bat families (Hipposideridae, Miniopteridae, Rhinolophidae,  
218 Pteropodidae) identified a number of ESVs that were significantly associated with either  
219 ectoparasitized or non-ectoparasitized bats (Fig. 6). Overall, we identified 89 and 24  
220 ESVs significantly associated with parasitized and non-parasitized bats, respectively  
221 (Table S3). Bacterial classes with the greatest representation among significant results  
222 were Actinobacteria (16 families), Gammaproteobacteria (11 families), Bacilli (5  
223 families), and Alphaproteobacteria (3 families). ESVs significantly enriched in parasitized  
224 bats from at least three out of four bat families included Mycobacteraceae  
225 (Actinobacteria), and Xanthomonadaceae (Gammaproteobacteria). ESVs significantly  
226 enriched in parasitized bats from at least two out of four bat families included  
227 Hyphomicrobiaceae (Alphaproteobacteria), Alcaligenaceae (Betaproteobacteria),  
228 Moraxellaceae (Gammaproteobacteria), Planococcaceae (Bacilli), Flavobacteraceae

229 (Flavobacteria), Halobacteraceae (Halobacteria), and Chitinophagaceae (Saprospirae)  
230 (Fig. 6).

231

## 232 DISCUSSION

233

234 The bacterial diversity we observed among gut, oral, and skin microbiota of bats  
235 fall within ranges similarly observed in other vertebrate groups (3, 20-23). Although few  
236 studies have simultaneously compared gut, oral, and skin microbiota from the same  
237 individuals, our data reflect an apparent trend in the literature of skin bacterial diversity  
238 among vertebrates significantly outnumbering gut or oral bacterial diversity (24-27). Our  
239 data corroborate the findings of Nishida and Ochman (3), revealing no relationship  
240 between chiropteran phylogeny and gut bacterial community dissimilarity. We found the  
241 same absence of phylogenetic signal among oral and skin microbial communities. As  
242 suggested in other studies of volant vertebrates (bats and birds), convergent adaptations  
243 driven by the evolution of flight may be influencing the nature and composition of  
244 microbial communities in both bats and birds (28-30).

245 Microbial community specificity can be assessed as a function of intraspecific  
246 variation in dissimilarity (beta dispersion), where low dispersion suggests a tight and  
247 perhaps co-evolutionary link between hosts and symbionts, whereas high dispersion  
248 suggests more random associations between hosts and symbionts (31). Measures of beta  
249 dispersion among bats revealed a continuum for all three anatomical sites, with oral  
250 bacterial communities showing lower levels of beta dispersion (for weighted UniFrac  
251 distances) than gut or skin communities (Fig. 3). This continuum suggests a possible

252 gradient of host-symbiont specificity across different bat species that may be influenced  
253 by evolutionary history or host ecology. Given that we found no association between  
254 bacterial community dissimilarity and host phylogenetic distance, variation in beta  
255 dispersion is more likely a reflection of host ecology than evolutionary history.

256         Similar to recent studies in North American bats (32), we found sampling locality  
257 to be a significant factor influencing skin, gut and oral microbial composition (Table 4).  
258 Furthermore, we observed an apparent trend in increasing Shannon diversity and  
259 observed ESV richness along an elevational gradient that was most pronounced for skin  
260 microbiota (Fig. S2). A positive correlation between bacterial richness and elevation has  
261 been observed in studies of amphibian skin (33) and montane soil, and this pattern may  
262 be the result of climatological and other abiotic factors (*e.g.* pH) found along elevational  
263 gradients (34, 35).

264         We found the general composition of gut microbiota in East African bats to be  
265 similar to that of Neotropical bats, with Proteobacteria being the dominant bacterial  
266 phylum present (36). Regardless of diet (insectivorous or frugivorous), the distal bat gut is  
267 dominated by bacteria in the family Enterobacteriaceae (Phylum: Proteobacteria), though  
268 fruit bats do have an increased relative abundance of bacteria in the family Clostridiaceae  
269 (Phylum: Firmicutes) relative to insectivorous bats. In their study of neotropical bats,  
270 Phillips et al. (37) noted an increased relative abundance of Lactobacillales in frugivorous  
271 bats, and we note a similar pattern among pteropodid fruit bats in this study, which  
272 exhibited a slightly higher proportion of Streptococcaceae (Order: Lactobacillales)  
273 relative to insectivorous bats. Overall, the domination of the chiropteran gut by



274 Proteobacteria differs markedly from other mammalian gut microbiomes, which are  
275 generally dominated by Firmicutes (21, 38, 39).

276 Among most bat families, the oral microbiome was dominated by Pasteurellaceae  
277 (Phylum: Proteobacteria), and in some cases a high relative abundance of bacteria in the  
278 families Mycoplasmataceae (in nycterids), Neisseriaceae (in vespertilionids and  
279 rhinonycterids), and Streptococcaceae (in pteropodids) was also observed. Although the  
280 oral microbiome has received less attention than that of the gut, several studies have  
281 found diverse Pasteurellaceae and Neisseria lineages present in the oral microbiota of  
282 animals, including domestic cats (20) and marine mammals (40). Pasteurellaceae lineages  
283 have also recently been documented in the oral microbiota of Tasmanian devils (23, 41).  
284 In humans, Pasteurallaceae (genera *Haemophilus* and *Aggregatibacter*) and Neisseriaceae  
285 (genera *Neisseria*, *Kingella*, and *Eikenella*) play an important role in the formation  
286 supragingival plaque (22). Though these bacterial groups are present in lower proportions  
287 in other animals relative to bats, their presence in a broad range of host taxa suggest a  
288 conserved evolutionary niche.

289 Our analysis identified links between ectoparasitism, malarial parasitism, and  
290 bacterial communities on the skin and in oral cavities, respectively. Network analyses  
291 identified consistent, stable, and species-rich clusters of bacteria on the skin of non-  
292 ectoparasitized bats, compared to relatively disconnected and apparently transient bacteria  
293 on the skin of bats harboring ectoparasites. This result mirrors that found in human-  
294 mosquito interactions, in which individuals with lower bacterial diversity on the skin are  
295 significantly more attractive to blood-seeking mosquitoes than individuals with higher  
296 diversity (42). In humans, skin bacteria play a known role in attracting mosquitoes via

297 their production of volatile organic compounds (VOCs), and studies have shown that  
298 variation in skin microbial community composition can increase or decrease human  
299 attractiveness to blood-seeking mosquitoes (42-44). Similar mechanisms may be at play  
300 in the bat-ectoparasite system, particularly given the phylogenetic proximity of  
301 hippoboscoid bat parasites to mosquitoes.

302         Several bacterial families exhibited significant associations with presence of  
303 ectoparasitism in bats based on DESeq analyses. Bacteria found across multiple host  
304 families included (but were not limited to) Alcaligenaceae, Chitinophagaceae,  
305 Flavobacteriaceae, Moraxellaceae, Mycobacteriaceae (*Mycobacterium* spp.), and  
306 Xanthomonadaceae. In many cases, these bacterial families were associated with  
307 parasitism in some bat families, and absence of parasitism in others, suggesting a  
308 potential mechanism by which ectoparasites might be distinguishing between “correct”  
309 and “incorrect” hosts. As suggested by human-mosquito interaction studies (42, 43, 45),  
310 bacteria positively associated with increased rates of blood-feeding dipteran host selection  
311 may be producing VOCs on which the insects rely to identify their hosts. Bacteria that  
312 are negatively associated with such insects may be consuming the products of the former,  
313 or may be producing VOCs of their own that mask those of the former (suggested by  
314 Verhulst et al. (42)). To better understand the mechanisms underlying these correlations  
315 in wild populations, future experiments should consider including sampling of VOCs *in*  
316 *vivo*.

317         PERMANOVA analyses identified associations between the oral microbiome  
318 and malarial parasite prevalence among bats in the family Miniopteridae, although these  
319 associations were less robust than those of the skin bacteria and ectoparasitism. Upon

320 further exploration of this potential association, we identified a single bacterial ESV in  
321 the genus *Actinobacillus* (99% similar to *A. porcinus* based on NCBI blastn search) as  
322 significantly reduced in malaria-free bats (baseMean 7.61,  $-24.2 \log_2 \text{FoldChange}$ ,  $p =$   
323  $1.7\text{E}-20$ ). Network analyses indicated no significant differences in connectivity or node  
324 degree distribution (results not shown). Because no other bat groups experienced rates of  
325 malarial parasitism adequate for statistical analyses, we were unable to explore this  
326 relationship further. Future studies that incorporate greater sampling of malaria-positive  
327 species may reveal more robust microbial associations, as have been documented in  
328 numerous experiments with controlled rodent and human malaria infections (45-47).

329         Although we cannot ascertain causality of differences in the microbial  
330 composition of skin in this study, our results support the hypothesis that these differences  
331 may provide a mechanism by which ectoparasites can locate or distinguish hosts.  
332 Alternatively, observed differences in microbial composition could result from microbial  
333 transfer from parasites to hosts. Given the known effect of locality and apparent absence  
334 of host phylogenetic signal in microbial community composition of skin, one possible  
335 explanation is that local environmental variables play a greater role in determining host-  
336 bacteria associations in bats. Indeed, in North America, multiple bat species have been  
337 found to share many bacterial genera with soil and plant material (32). Thus, local  
338 conditions and bacterial composition of bat roosts are likely playing an important role in  
339 driving the composition of skin bacteria, and via mechanisms similar to the camouflage  
340 hypothesis, could subsequently influence which individuals become parasitized.

341

342 METHODS

343

344 1) Sampling

345

346 Sampling for this study was conducted from the eastern coast of Kenya to the northern  
347 border of Uganda during August–October 2016 (Fig. 1; Table S1, S2). Eight families  
348 and nineteen genera of bats (order: Chiroptera) were collected as part of bird and small  
349 mammal biodiversity inventories. All sampling was conducted in accordance with the  
350 Field Museum of Natural History IACUC and voucher specimens are accessioned at the  
351 Field Museum of Natural History (Table S2). Blood samples were collected and screened  
352 for haemosporidia and haemosporidian taxonomy was assigned using previously described  
353 molecular methods (13). Following blood sampling, ectoparasites were removed with  
354 forceps and placed directly into 95% EtOH; ectoparasites taxonomy was assigned based  
355 on morphological features. For the purposes of analysis with microbiome data,  
356 ectoparasite and malarial status were each scored separately as 1 (present) or 0 (absent).  
357 Gut, skin, and oral samples were taken for each bat for microbial analyses. Gut samples  
358 consisted of fecal material collected directly from the distal end of the colon using  
359 sterilized tools, and preserved on Whatman® FTA® cards for microbiome analyses. For  
360 oral microbiome analyses, we preserved both buccal swabs in  $\text{LN}_2$  and tongue biopsies in  
361 95% ethanol (EtOH). Comparison of ESV diversity obtained from paired subsets of each  
362 sample type revealed greater diversity recovered from tongue biopsies (data not shown);  
363 tongues were therefore used for characterization of oral microbiomes in this study. Lastly,  
364 skin samples from five regions of the body (ear, wing membrane, tail membrane, chest,  
365 back) were collected and pooled in 95% EtOH using sterile Integra® Miltex® 5mm

366 biopsy punches. The goal of sampling from five body regions was to maximize bacterial  
367 diversity recovered from the external skin surface of each individual. We based our  
368 storage media selections on the recent study by Song et al. (48). Host sequencing and  
369 phylogenetic methods are described in Fig. S2.

370

371 2) Microbiome sequencing, characterization, and parasite association

372

373 DNA extractions were performed on gut, tongue, and skin samples using the MoBio  
374 PowerSoil 96 Well Soil DNA Isolation Kit (Catalog No. 12955-4, MoBio, Carlsbad,  
375 CA, USA). We used the standard 515f and 806r primers (49-51) to amplify the V4  
376 region of the 16S rRNA gene, using mitochondrial blockers to reduce amplification of  
377 host mitochondrial DNA. Sequencing was performed using paired-end 150 base reads  
378 on an Illumina HiSeq sequencing platform. Following standard demultiplexing and  
379 quality filtering using the Quantative Insights Into Microbial Ecology pipeline  
380 (QIIME2) (52) and vsearch8.1 (53), ESVs were identified using the Deblur method (19)  
381 and taxonomy was assigned using the Greengenes Database (May 2013 release;  
382 <http://greengenes.lbl.gov>). Libraries containing fewer than 1000 reads were removed  
383 from further analyses. Negative controls all contained fewer than 1000 reads and were  
384 filtered at this step. We did not rarefy the data, based on the recommendations of  
385 McMurdie and Holmes (54). Data were then subset for analyses according to sample  
386 type, host genus, and locality (or some combination thereof). Site-specific analyses were  
387 only performed for sites from which five or more individual bats were sampled. We  
388 calculated alpha diversity for each sample type (gut, oral, skin) using the Shannon index,

389 and measured species richness based on actual observed diversity. Significance of differing  
390 mean values for each diversity calculation was determined using the Kruskal-Wallis rank  
391 sum test, followed by a post-hoc Dunn test with bonferroni corrected  $p$ -values. Three  
392 measures of beta diversity (unweighted UniFrac, weighted UniFrac, and Bray-Curtis)  
393 were calculated using relative abundances of each ESV (calculated as ESV read depth  
394 over total read depth per library). Significant drivers of community similarity were  
395 identified using the ADONIS test with Bonferroni correction for multiple comparisons  
396 using the R package Phyloseq (55). Complete code for microbiome analyses can be found  
397 at <http://github.com/hollylutz/BatMP>.

398

399 3) Machine learning and network analyses

400

401 A supervised machine learning approach was used to produce random forests (RF) for the  
402 classification of different variables. RFs were constructed using 500 decision trees and  
403 subsets of ESV data via the supervised\_learning.py script implemented in QIIME (52).  
404 We tested the ability of RFs to accurately classify 1) anatomical site (using all data), 2)  
405 host genus (using gut, oral, or skin microbial data separately), 3) ecotparasite status (using  
406 skin microbial data), and 4) malarial status (using oral microbial data). RF performance  
407 was assessed by comparing the out-of-bag estimated error (OOB) with baseline (random)  
408 error. If the ratio of OOB to baseline error was less than or equal to two, the model was  
409 considered to perform reasonably well, as it performed at least twice as well as random  
410 (56). To reconstruct microbial networks for skin and oral bacterial communities within  
411 bat family groupings (which were further sub-divided into parasitized or non-

412 parasitized), we utilized the R package Sparse Inverse Covariance Estimation for  
413 Ecological Association Inference (SPIEC-EASI) (57). All network datasets were filtered  
414 to contain only ESVs that appeared in at least three individuals within each respective  
415 dataset. Network results produced with SPIEC-EASI were summarized using the R  
416 packages CAVnet (58) and igraph (59). Network stability was assessed by sequentially  
417 removing network nodes (ordered by betweenness centrality and degree) and observing  
418 natural connectivity (*i.e.* eigenvalue of the graph adjacency matrix) as nodes are removed.  
419 To determine which, if any, bacterial ESVs were significantly associated with ectoparasite  
420 or malarial prevalence, we performed analyses based on the negative binomial distribution  
421 of ESVs relative abundance, utilizing the R package DESeq2 (60). False discovery rate  
422 (FDR) was calculated using the Benjamini-Hochberg method (default method in  
423 DESeq), and  $p$ -values were adjusted accordingly.

424

## 425 ACKNOWLEDGMENTS

426

427 We thank the Kenya Wildlife Service and the Uganda Wildlife Authority for permission  
428 to conduct research in national parks. For logistical support and assistance in the field, we  
429 thank Mike Bartonjo of the National Museums of Kenya, Phausia Kweyu of Karatina  
430 University, Dr. Robert Kityo, Solomon Sebuliba, and Cissy Akoth of the Makerere  
431 University Zoological Museum, Drs. Brian Amman, Jonathan Towner, and Rebecca  
432 Tiller of the Centers for Disease Control and Prevention, and Lauren Lutz. We thank  
433 Neil Gottel for his knowledge and assistance with laboratory processing of microbial  
434 samples, and other members of the Gilbert Lab, including Alyson Yee, Cesar Cardona,

435 Thomas Kuntz, Drs. Bea Penalver, Melissa Dsouza, and Naseer Sangwan for the  
436 assistance with bacterial 16s analyses.

437

#### 438 AUTHOR CONTRIBUTIONS

439 H.L.L. designed the research and wrote the first draft; H.L.L., E.W.J., T.C.D. analyzed  
440 data; H.L.L., P.W.W., W.B.S., J.C.K. conducted field research; J.A.G., B.D.P. provided  
441 funding and research support; all authors interpreted results and contributed to writing.

442

#### 443 REFERENCES

444

445

- 446 1. Human Microbiome Project C (2012) Structure, function and diversity of the  
447 healthy human microbiome. *Nature* 486(7402):207-214.
- 448 2. Thaïss CA, Zmora N, Levy M, & Elinav E (2016) The microbiome and innate  
449 immunity. *Nature* 535(7610):65-74.
- 450 3. Nishida AH & Ochman H (2018) Rates of gut microbiome divergence in  
451 mammals. *Mol Ecol* 27(8):1884-1897.
- 452 4. Moeller AH, *et al.* (2014) Rapid changes in the gut microbiome during human  
453 evolution. *Proc Natl Acad Sci U S A* 111(46):16431-16435.
- 454 5. Kundu P, Blacher E, Elinav E, & Pettersson S (2017) Our Gut Microbiome: The  
455 Evolving Inner Self. *Cell* 171(7):1481-1493.
- 456 6. Li X, *et al.* (2017) Composition of Gut Microbiota in the Gibel Carp (*Carassius*  
457 *auratus gibelio*) Varies with Host Development. *Microb Ecol* 74(1):239-249.
- 458 7. Kolodny o, *et al.* (2017).



- 459 8. McFall-Ngai M, *et al.* (2013) Animals in a bacterial world, a new imperative for  
460 the life sciences. *Proc Natl Acad Sci U S A* 110(9):3229-3236.
- 461 9. Kwiatkowski DP (2005) How malaria has affected the human genome and what  
462 human genetics can teach us about malaria. *Am. J. Hum. Genet.* 77:171-190.
- 463 10. Dittmar K, Morse, Solo F., Dick, Carl W., Patterson, Bruce D. (2015) Bat fly  
464 evolution from the Eocene to the present (Hippoboscoidea, Streblidae and  
465 Nycteribiidae). *Parasite Diversity and Diversification: Evolutionary Ecology Meets*  
466 *Phylogenetics*, ed S. Morand BRK, D. T. J. Littlewood (Cambridge University  
467 Press, Cambridge, U. K.).
- 468 11. Dick CW, Patterson, B. D. (2006) *Micromammals and Macroparasites: From*  
469 *Evolutionary Ecology to Management* (Springer, Kato Bunmeisha, Japan).
- 470 12. Schaer J, *et al.* (2013) High diversity of West African bat malaria parasites and a  
471 tight link with rodent Plasmodium taxa. *Proceedings of the National Academy of*  
472 *Sciences* 100:17415-17419.
- 473 13. Lutz HL, *et al.* (2016) Diverse sampling of East African haemosporidians reveals  
474 chiropteran origin of malaria parasites in primates and rodents. *Mol Phylogenet*  
475 *Evol* 99:7-15.
- 476 14. Bausch DG, Schwarz, L. (2014) Outbreak of Ebola virus disease in Guinea:  
477 where ecology meets economy. *PLoS Negl Trop Dis* 8(7):e3056.
- 478 15. Hayman DT, Bowen, R.A., Cryan, P.M., McCracken, G.F., O'Shea, T.J., Peel,  
479 A.J., Gilbert, A., Webb, C.T., Wood, J.L. (2013) Ecoogy of zoonotic infectious  
480 diseases in bats: current knowledge and future directions. *Zoonoses and Public*  
481 *Health* 60:2-21.

- 482 16. Towner JS, *et al.* (2009) Isolation of genetically diverse Marburg viruses from  
483 Egyptian fruit bats. *PLoS Pathog* 5(7):e1000536.
- 484 17. Olival KJ & Hayman DT (2014) Filoviruses in bats: current knowledge and  
485 future directions. *Viruses* 6(4):1759-1788.
- 486 18. Amman BR, *et al.* (2015) A Recently Discovered Pathogenic Paramyxovirus,  
487 Sosuga Virus, is Present in Rousettus aegyptiacus Fruit Bats at Multiple  
488 Locations in Uganda. *J Wildl Dis* 51(3):774-779.
- 489 19. Amir A, *et al.* (2017) Deblur Rapidly Resolves Single-Nucleotide Community  
490 Sequence Patterns. *mSystems* 2(2).
- 491 20. Sturgeon A, Pinder SL, Costa MC, & Weese JS (2014) Characterization of the  
492 oral microbiota of healthy cats using next-generation sequencing. *Vet J*  
493 201(2):223-229.
- 494 21. Ley RE, *et al.* (2008) Evolution of mammals and their gut microbes. *Science*  
495 320(5883):1647-1651.
- 496 22. Mark Welch JL, Rossetti BJ, Rieken CW, Dewhirst FE, & Borisy GG (2016)  
497 Biogeography of a human oral microbiome at the micron scale. *Proc Natl Acad Sci*  
498 *USA* 113(6):E791-800.
- 499 23. Brix L, Hansen MJ, Kelly A, Bertelsen MF, & Bojesen AM (2015) Occurrence  
500 of Pasteurellaceae Bacteria in the Oral Cavity of the Tasmanian Devil  
501 (*Sarcophilus Harrisii*). *J Zoo Wildl Med* 46(2):241-245.
- 502 24. Grice EA & Segre JA (2011) The skin microbiome. *Nat Rev Microbiol* 9(4):244-  
503 253.

- 504 25. Ursell LK, *et al.* (2012) The interpersonal and intrapersonal diversity of human-  
505 associated microbiota in key body sites. *J Allergy Clin Immunol* 129(5):1204-1208.
- 506 26. Costello EK, *et al.* (2009) Bacterial community variation in human body habitats  
507 across space and time. *Science* 326(5960):1694-1697.
- 508 27. Chiarello M, Villéger, S., Bouvier, C., Bettarel, Y., Bouvier, T. (2015) High  
509 diversity of skin-associated bacterial communities in marine fishes is promoted by  
510 their high variability among body parts, individuals and species. *FEMS Microbiol*  
511 *Ecol* 91(7):1-12.
- 512 28. Caviedes-Vidal E, McWhorter, T. J., Lavin, S. R., Chediak, J. G., Tracy, C. R.,  
513 Karasov, W. H. (2007) The digestive adaptation of flying vertebrates: High  
514 intestinal paracellular absorption compensates for smaller guts. *PNAS*  
515 104(48):19132-19137.
- 516 29. Price ER, Brun A, Caviedes-Vidal E, & Karasov WH (2015) Digestive  
517 adaptations of aerial lifestyles. *Physiology (Bethesda)* 30(1):69-78.
- 518 30. Caviedes-Vidal E, *et al.* (2008) Paracellular absorption: a bat breaks the mammal  
519 paradigm. *PLoS One* 3(1):e1425.
- 520 31. Thomas T, *et al.* (2016) Diversity, structure and convergent evolution of the  
521 global sponge microbiome. *Nat Commun* 7:11870.
- 522 32. Avena CV, *et al.* (2016) Deconstructing the Bat Skin Microbiome: Influences of  
523 the Host and the Environment. *Front Microbiol* 7:1753.
- 524 33. Muletz Wolz CR, Yarwood SA, Campbell Grant EH, Fleischer RC, & Lips KR  
525 (2018) Effects of host species and environment on the skin microbiome of  
526 Plethodontid salamanders. *J Anim Ecol* 87(2):341-353.

- 527 34. Bryant JA, Lamanna, C., Morlon, H., Kerkhoff, A. J., Enquist, B. J., Green, J. L.  
528 (2008) Microbes and mountainsides: contrasting elevational patterns of bacterial  
529 and plan diversity. *PNAS* 105:11505-11511.
- 530 35. Singh D, *et al.* (2014) Strong elevational trends in soil bacterial community  
531 composition on Mt. Halla, South Korea. *Soil Biology and Biochemistry* 68:140-149.
- 532 36. Carrillo-Araujo M, *et al.* (2015) Phyllostomid bat microbiome composition is  
533 associated to host phylogeny and feeding strategies. *Front Microbiol* 6:447.
- 534 37. Phillips CD, *et al.* (2012) Microbiome analysis among bats describes influences of  
535 host phylogeny, life history, physiology and geography. *Mol Ecol* 21(11):2617-  
536 2627.
- 537 38. Eckburg PB, Bik, E. M., Bernstein, C. N., Purdom, E., Dethlefsen, L., Sargent,  
538 M., Gill, S. R., Nelson, K. E., Relman, D. A. (2005) Diversity of human  
539 intestinal microbial flora. *Science* 308(5728):1635-1638.
- 540 39. Yildirim S, *et al.* (2010) Characterization of the fecal microbiome from non-  
541 human wild primates reveals species specific microbial communities. *PLoS One*  
542 5(11):e13963.
- 543 40. Bik EM, *et al.* (2016) Marine mammals harbor unique microbiotas shaped by and  
544 yet distinct from the sea. *Nat Commun* 7:10516.
- 545 41. Gutman N, Hansen MJ, Bertelsen MF, & Bojesen AM (2016) Pasteurellaceae  
546 bacteria from the oral cavity of Tasmanian devils (*Sarcophilus Harrisii*) show high  
547 minimum inhibitory concentration values towards aminoglycosides and  
548 clindamycin. *Lett Appl Microbiol* 62(3):237-242.

- 549 42. Verhulst NO, *et al.* (2011) Composition of human skin microbiota affects  
550 attractiveness to malaria mosquitoes. *PLoS One* 6(12):e28991.
- 551 43. Busula AO, Takken W, JG DEB, Mukabana WR, & Verhulst NO (2017)  
552 Variation in host preferences of malaria mosquitoes is mediated by skin bacterial  
553 volatiles. *Med Vet Entomol* 31(3):320-326.
- 554 44. Verhulst NO, *et al.* (2009) Cultured skin microbiota attracts malaria mosquitoes.  
555 *Malar J* 8:302.
- 556 45. Robinson A, *et al.* (2018) Plasmodium-associated changes in human odor attract  
557 mosquitoes. *Proc Natl Acad Sci U S A* 115(18):E4209-E4218.
- 558 46. De Moraes CM, *et al.* (2014) Malaria-induced changes in host odors enhance  
559 mosquito attraction. *Proc Natl Acad Sci U S A* 111(30):11079-11084.
- 560 47. de Boer JG, *et al.* (2017) Odours of Plasmodium falciparum-infected participants  
561 influence mosquito-host interactions. *Sci Rep* 7(1):9283.
- 562 48. Song SJ, Amir, A., Metcalf, J. L., Amato, K. R., Xu, Z. Z., Humphrey, G.,  
563 Knight, R. (2016) Preservation methods differ in fecal microbiome stability,  
564 affecting suitability for field studies. *mSystems* 1(3):1 - 12.
- 565 49. Caporaso JG, Lauber, C. L., Walters, W. A., Berg-Lyons, D., Lozupone, C. A.,  
566 Turnbaugh, P. J., Fierer, N., Knight, R. (2011) Global patterns of 16S rRNA  
567 diversity at a depth of millions of sequences per sample. *PNAS* 108:4516-4522.
- 568 50. Caporaso JG, *et al.* (2012) Ultra-high-throughput microbial community analysis  
569 on the Illumina HiSeq and MiSeq platforms. *ISME J* 6(8):1621-1624.
- 570 51. Kozich JJ, Westcott, S. L., Baxter, N. T., Highlander, S. K., Schloss, P. D.  
571 (2013) Development of a dual-index sequencing strategy and curation pipeline for

- 572 analyzing amplicon sequence data on the MiSeq Illumina sequencing platform.  
573 *Applied and Environmental Microbiology* 79(17):5122-5120.
- 574 52. Caporaso JG, Kuczynski, J., Stombaugh, J., Bittinger, K., Bushman, F. D.,  
575 Costello, E. K., Fierer, N., Gonzalez Peña, A., Goodrich, E. K., Gordon, J. I.,  
576 Huttley, G. A., Kelley, S. T., Knights, D., Koenig, J. E., Ley, R. E., Lozupone,  
577 C. A., McDonald, D., Muegge, B. D., Pirrung, M., Reeder, J., Sevinsky, J. R.,  
578 Turnbaugh, P. J., Walters, W. A., Widmann, J., Yatsunenko, T., Zaneveld, J.,  
579 Knight, R. (2010) QIIME allows analysis of high-throughput community  
580 sequencing data. *Nature Methods* 7(5):335 - 336.
- 581 53. Rognes T, Flouri T, Nichols B, Quince C, & Mahe F (2016) VSEARCH: a  
582 versatile open source tool for metagenomics. *PeerJ* 4:e2584.
- 583 54. McMurdie PJ, Holmes, S. (2014) Waste not, want not: Why rarefying  
584 microbiome data is inadmissible. *PLoS Comput Biol* 10(4):1-12.
- 585 55. McMurdie PJ & Holmes S (2013) phyloseq: an R package for reproducible  
586 interactive analysis and graphics of microbiome census data. *PLoS One*  
587 8(4):e61217.
- 588 56. Breiman L (2001) Random Forests. *Machine Learning* 45:5-32.
- 589 57. Kurtz ZD, *et al.* (2015) Sparse and compositionally robust inference of microbial  
590 ecological networks. *PLoS Comput Biol* 11(5):e1004226.
- 591 58. Cardona C (2017) CAVNet: Creation Analysis and Visualization of Networks).
- 592 59. Csardi G, Nepusz, T. (2006) The Igraph Software Package for Complex Network  
593 Research. *InterJournal, Complex Systems* 1695.

- 594 60. Love MI, Huber W, & Anders S (2014) Moderated estimation of fold change  
595 and dispersion for RNA-seq data with DESeq2. *Genome Biol* 15(12):550.
- 596 61. Teeling EC, Springer, M. S., Madsen, O., Bates, P., O'Brien, S. J., Murphy, W.  
597 J. (2005) A molecular phylogeny for bats illuminates biogeography and fossil  
598 record. *Science* 307:580-584.
- 599
- 600
- 601
- 602
- 603
- 604
- 605
- 606
- 607
- 608
- 609
- 610
- 611
- 612
- 613
- 614
- 615
- 616

617 FIGURE LEGENDS

618

619 Figure 1. Sampling localities and elevation, grouped by district. Colors correspond to  
620 elevation, and white numbers and size of points correspond to number of bats collected.

621

622 Figure 2. Alpha diversity of Exact Sequence Variants (ESVs) by anatomical sites,  
623 including (A) Observed richness, (B) Shannon index of diversity, (C) ESVs shared  
624 between anatomical sites. Asterisks indicate significant differences between groups  
625 (Dunn's Test, Bonferroni corrected  $p$ -value  $p < 0.0001$ ).

626

627 Figure 3. Intraspecific variation across anatomical sites measured as beta dispersion of  
628 weighted UniFrac distances. Dotted lines indicate mean dispersion for anatomical  
629 groupings; numbers in parentheses indicate sample size per bat species. White and gray  
630 boxes correspond to the chiropteran suborders Yangochiroptera (microbats) and  
631 Yinpterochiroptera (fruit bats and kin), respectively.

632

633 Figure 4. (A) Relative abundance of top 6 bacterial phyla grouped by anatomical site,  
634 with each bar corresponding to individual libraries. (B) Relative abundance of the most  
635 prevalent eight bacterial families across all anatomical sites, grouped by bat family.

636 Phylogeny based on Teeling et al. (61).

637

638 Figure 5. (A) Distribution of skin microbial network clusters for parasitized and non-  
639 parasitized bats, grouped by bat family (\* indicates significance at  $p < 0.005$ , Kruskal-



640 Wallis) (B) Visualization of skin bacterial networks (based on Fruchterman-Reingold  
641 algorithm); colored nodes correspond to unique clusters of co-occurring ESVs within  
642 each network.

643

644 Figure 6. Log<sub>2</sub>fold change in relative abundance of skin-associated ESVs from the four  
645 most-sampled bat families. ESVs shown were found to be significantly associated with  
646 ectoparasite status in bats based on analysis of negative binomial distributions of relative  
647 abundance (Benjamini-Hochberg FDR corrected  $p$ -value  $p < 0.05$ ). Positive values  
648 correspond to ESVs found to be enriched on parasitized bats, and negative values  
649 correspond to ESVs found to be enriched on non-parasitized bats. Gray bars highlight  
650 ESVs in bacterial families that were enriched in parasitized bats for three out of four bat  
651 families.

652

Table 1. Bat sampling, ectoparasite prevalence ( $n_{\text{ecto}}$ ), and malarial parasite prevalence ( $n_{\text{haem}}$ ) and identification.

| Bat family       | Bat species                      | $n_{\text{bats}}$ | $n_{\text{ecto}}$ (%) | $n_{\text{haem}}$ (%) |
|------------------|----------------------------------|-------------------|-----------------------|-----------------------|
| Emballonuridae   | <i>Coleura afra</i>              | 11                | 2 (18)                | 0                     |
| Hipposideridae   | <i>Hipposideros caffer</i>       | 47                | 18 (38)               | 0                     |
|                  | <i>Hipposideros camerunensis</i> | 2                 | 0                     | 0                     |
|                  | <i>Hipposideros ruber</i>        | 21                | 16 (76)               | 0                     |
|                  | <i>Macronycteris vittatus</i>    | 10                | 0                     | 0                     |
| Miniopteridae    | <i>Miniopterus africanus</i>     | 22                | 13 (59)               | 11 (50)               |
|                  | <i>Miniopterus natalensis</i>    | 54                | 16 (30)               | 13 (24)               |
|                  | <i>Miniopterus rufus</i>         | 22                | 20 (61)               | 20 (91)               |
|                  | <i>Miniopterus minor</i>         | 18                | 16 (89)               | 12 (67)               |
| Molossidae       | <i>Chaerephon bivittatus</i>     | 14                | 0                     | 0                     |
|                  | <i>Otomops harrisoni</i>         | 33                | 1 (3)                 | 0                     |
| Nycteridae       | <i>Nycteris arge</i>             | 3                 | 0                     | 0                     |
|                  | <i>Nycteris thebaica</i>         | 7                 | 1 (14)                | 0                     |
|                  | <i>Nycteris</i> sp.              | 6                 | 0                     | 0                     |
| Pteropodidae     | <i>Epomophorus labiatus</i>      | 2                 | 0                     | 0                     |
|                  | <i>Epomophorus wahlbergi</i>     | 11                | 0                     | 3 (27)                |
|                  | <i>Micropteropus pusillus</i>    | 4                 | 0                     | 0                     |
|                  | <i>Myonycteris angolensis</i>    | 4                 | 0                     | 0                     |
|                  | <i>Rousettus aegyptiacus</i>     | 48                | 24 (50)               | 0                     |
|                  | <i>Stenonycteris lanosus</i>     | 37                | 23 (62)               | 0                     |
| Rhinolophidae    | <i>Rhinolophus clivosus</i>      | 43                | 8 (19)                | 0                     |
|                  | <i>Rhinolophus eloquens</i>      | 24                | 19 (79)               | 0                     |
|                  | <i>Rhinolophus hildebrandti</i>  | 4                 | 1 (25)                | 0                     |
|                  | <i>Rhinolophus landeri</i>       | 14                | 0                     | 3 (21)                |
|                  | <i>Rhinolophus</i> sp.           | 3                 | 0                     | 0                     |
| Rhinonycteridae  | <i>Triaenops afer</i>            | 10                | 6 (60)                | 0                     |
| Vespertilionidae | <i>Myotis tricolor</i>           | 9                 | 8 (89)                | 3 (33)                |
|                  | <i>Neoromicia nana</i>           | 1                 | 0                     | 0                     |
|                  | <i>Neoromicia</i> sp.            | 3                 | 0                     | 0                     |
|                  | <i>Pipistrellus</i> sp.          | 1                 | 0                     | 0                     |
|                  | <i>Scotoecus hindei</i>          | 4                 | 1 (25)                | 0                     |
|                  | <i>Scotophilus dingani</i>       | 3                 | 0                     | 0                     |
| Total            |                                  | 495               | 193                   | 65                    |

Table 2. Alpha diversity of microbial communities across anatomical sites within each host genus, measured by Shannon Index of diversity (S-I) and observed sOTU richness (obs); n corresponds to number of libraries included in each calculation (following quality filtering).

| Host Family      | Host Genus           | Fecal |     |                    | Oral |     |                   | Skin |      |                   |
|------------------|----------------------|-------|-----|--------------------|------|-----|-------------------|------|------|-------------------|
|                  |                      | S-I   | obs | $n_{fecal}$        | S-I  | obs | $n_{oral}$        | S-I  | obs  | $n_{skin}$        |
| Emballonuridae   | <i>Chaerephon</i>    | 1.16  | 52  | 12                 | 1.39 | 57  | 14                | 3.57 | 547  | 14                |
| Hipposideridae   | <i>Hipposideros</i>  | 1.70  | 79  | 65                 | 2.01 | 155 | 52                | 4.95 | 439  | 74                |
|                  | <i>Macronycteris</i> | 1.82  | 74  | 9                  | 2.12 | 110 | 9                 | 4.94 | 883  | 7                 |
| Miniopteridae    | <i>Miniopterus</i>   | 1.41  | 70  | 92                 | 1.55 | 87  | 74                | 4.12 | 403  | 114               |
| Molossidae       | <i>Coleura</i>       | 1.59  | 52  | 11                 | 0.38 | 41  | 11                | 4.01 | 566  | 11                |
|                  | <i>Otomops</i>       | 0.88  | 53  | 26                 | 0.35 | 22  | 26                | 3.88 | 288  | 33                |
| Nycteridae       | <i>Nycteris</i>      | 1.60  | 80  | 10                 | 1.62 | 78  | 14                | 4.48 | 807  | 14                |
| Pteropodidae     | <i>Epomophorus</i>   | 1.44  | 49  | 11                 | 1.42 | 46  | 11                | 3.78 | 566  | 13                |
|                  | <i>Micropteropus</i> | 1.90  | 39  | 3                  | 2.21 | 39  | 4                 | 2.30 | 84   | 3                 |
|                  | <i>Myonycteris</i>   | 1.14  | 117 | 4                  | 1.29 | 195 | 5                 | 5.21 | 1246 | 4                 |
|                  | <i>Rousettus</i>     | 1.62  | 93  | 32                 | 1.95 | 84  | 34                | 4.90 | 1207 | 34                |
|                  | <i>Stenonycteris</i> | 1.55  | 61  | 41                 | 1.72 | 97  | 38                | 4.59 | 855  | 33                |
| Rhinolophidae    | <i>Rhinolophus</i>   | 1.34  | 62  | 58                 | 1.95 | 81  | 59                | 4.71 | 543  | 79                |
| Rhinonycteridae  | <i>Triaenops</i>     | 1.69  | 82  | 9                  | 1.28 | 414 | 9                 | 4.03 | 508  | 10                |
| Vespertilionidae | <i>Myotis</i>        | 1.62  | 54  | 1                  | 1.33 | 72  | 6                 | 5.41 | 771  | 3                 |
|                  | <i>Neoromicia</i>    | 2.13  | 65  | 4                  | 1.47 | 37  | 4                 | 3.76 | 267  | 4                 |
|                  | <i>Pipistrellus</i>  | 1.05  | NA  | 1                  | NA   | NA  | 0                 | 4.80 | 360  | 2                 |
|                  | <i>Scotoecus</i>     | 1.86  | 92  | 4                  | 1.97 | 17  | 3                 | 4.20 | 360  | 4                 |
|                  | <i>Scotophilus</i>   | 1.23  | 64  | 3                  | 0.38 | 96  | 1                 | 4.08 | 459  | 2                 |
| Mean             |                      | 1.51  | 69  | $n_{fecal}$<br>396 | 1.47 | 96  | $n_{oral}$<br>375 | 4.30 | 587  | $n_{skin}$<br>458 |

Table 3. Nonparametric permutational multivariate analysis of variance using distance matrices (via ADONIS), with distance matrices among sources of variation partitioned by host taxonomy (species nested within genus), ectoparasite status, malarial infection status, and locality included as strata to constrain permutation across this variable; \* indicates p-value < 0.05.

| Site  | Partition Variable     | Weighted UniFrac |       |        | Unweighted UniFrac |       |        | Bray-Curtis |       |        |
|-------|------------------------|------------------|-------|--------|--------------------|-------|--------|-------------|-------|--------|
|       |                        | F                | R2    | Pr(>F) | F                  | R2    | Pr(>F) | F           | R2    | Pr(>F) |
| Fecal | (Host genus (species)) | 4.27             | 0.162 | 0.001* | 3.15               | 0.120 | 0.001* | 2.89        | 0.110 | 0.001* |
|       | Ectoparasite status    | 0.47             | 0.001 | 0.912  | 1.42               | 0.004 | 0.048* | 1.40        | 0.004 | 0.097  |
|       | Malarial status        | 1.34             | 0.004 | 0.21   | 1.33               | 0.004 | 0.077  | 1.98        | 0.005 | 0.011* |
| Oral  | (Host genus (species)) | 6.82             | 0.279 | 0.001* | 3.50               | 0.143 | 0.001* | 6.69        | 0.274 | 0.001* |
|       | Ectoparasite status    | 0.51             | 0.001 | 0.836  | 1.41               | 0.004 | 0.057  | 1.00        | 0.003 | 0.447  |
|       | Malarial status        | 2.78             | 0.008 | 0.015* | 1.17               | 0.003 | 0.2    | 1.98        | 0.006 | 0.019* |
| Skin  | (Host genus (species)) | 7.68             | 0.329 | 0.001* | 3.98               | 0.170 | 0.001* | 5.60        | 0.240 | 0.001* |
|       | Ectoparasite status    | 2.42             | 0.006 | 0.01*  | 1.54               | 0.004 | 0.02*  | 2.07        | 0.005 | 0.001* |
|       | Malarial status        | 0.92             | 0.002 | 0.513  | 1.02               | 0.002 | 0.363  | 1.06        | 0.003 | 0.32   |

Table 4. Permutational multivariate analysis of variance using distance matrices, with distance matrices among sources of variation partitioned by host taxonomy (species nested within genus), locality, and anatomical site.

| Partition Variable | Weighted UniFrac |        |        | Unweighted UniFrac |       |        | Bray-Curtis |       |        |
|--------------------|------------------|--------|--------|--------------------|-------|--------|-------------|-------|--------|
|                    | SumSq            | F      | Pr(>F) | SumSq              | F     | Pr(>F) | SumSq       | F     | Pr(>F) |
| Anatomical site    | 10.67            | 198.01 | 0.001* | 56.52              | 82.90 | 0.001* | 38.2        | 36.97 | 0.001* |
| Host Genus         | 3.77             | 13.09  | 0.001* | 25.54              | 7.02  | 0.001* | 85.30       | 15.06 | 0.001* |
| Locality           | 1.56             | 11.00  | 0.001* | 20.62              | 11.34 | 0.001* | 23.85       | 8.42  | 0.001* |
| Host Genus:species | 1.39             | 4.08   | 0.001* | 11.20              | 2.59  | 0.001* | 25.25       | 1.33  | 0.001* |

Table 5. Supervised machine learning results, showing random forest model performance with respect to different classification variables and input data sets (fecal, oral, skin microbiome). Model performance is assessed by measuring the ratio of Out-of-bag estimated error (OOB) to baseline error.

| Classification variable              | Input Data | Baseline error | OOB error | Baseline:OOB |
|--------------------------------------|------------|----------------|-----------|--------------|
| Anatomical site                      | All data   | 0.68           | 0.14      | 4.8          |
| Host Genus                           | Skin       | 0.75           | 0.17      | 4.3          |
| Host Genus                           | Oral       | 0.78           | 0.24      | 3.2          |
| Host Genus                           | Gut        | 0.77           | 0.35      | 2.2          |
| Ectoparasite Status                  | Skin       | 0.53           | 0.27      | 2.0          |
| Malarial Status (Miniopteridae only) | Oral       | 0.46           | 0.38      | 1.2          |

FIGURE 1

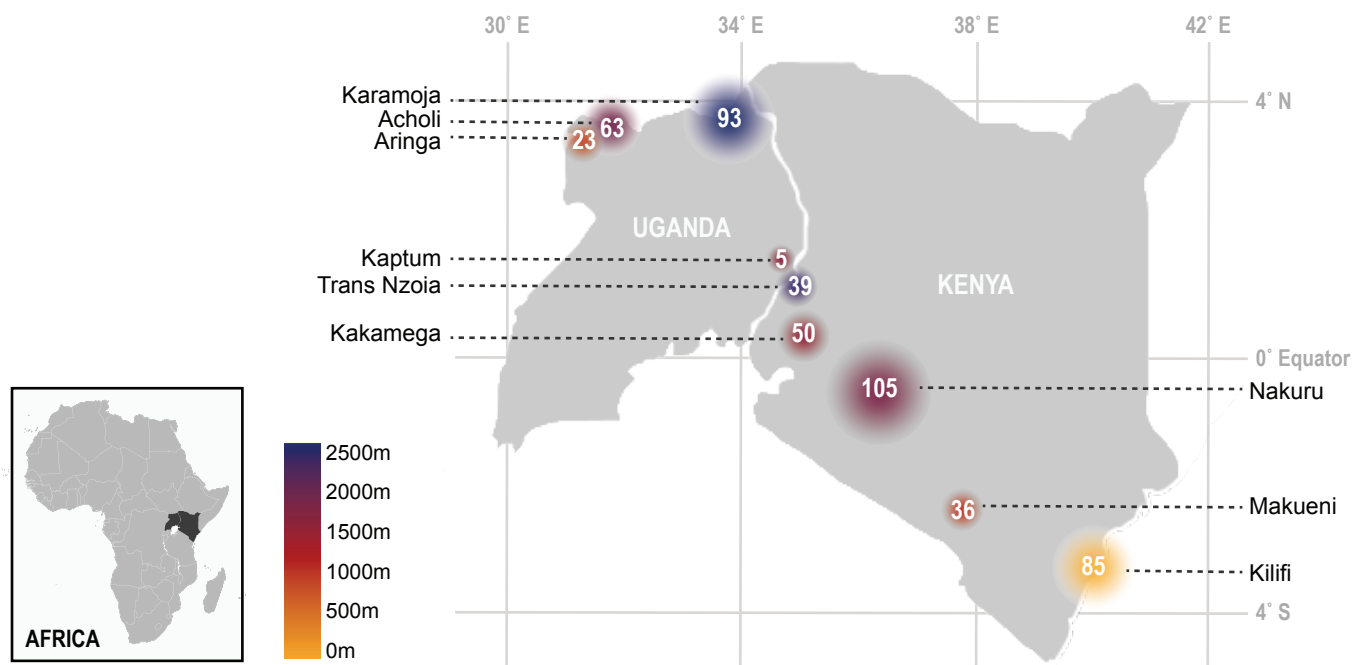

FIGURE 2

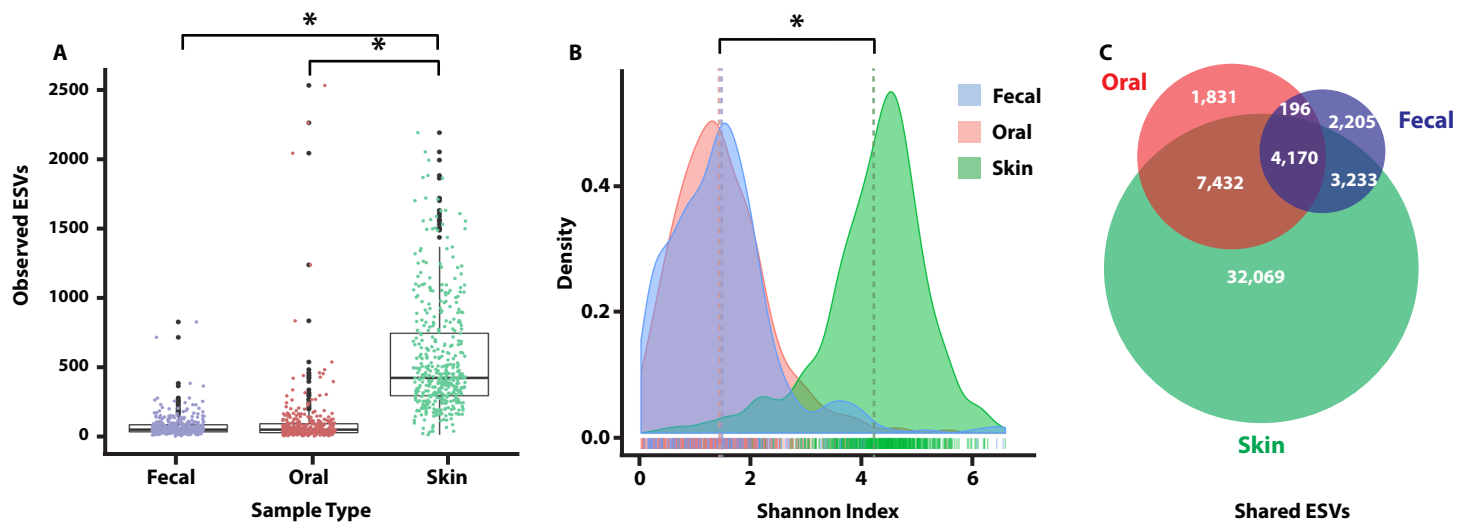



FIGURE 3

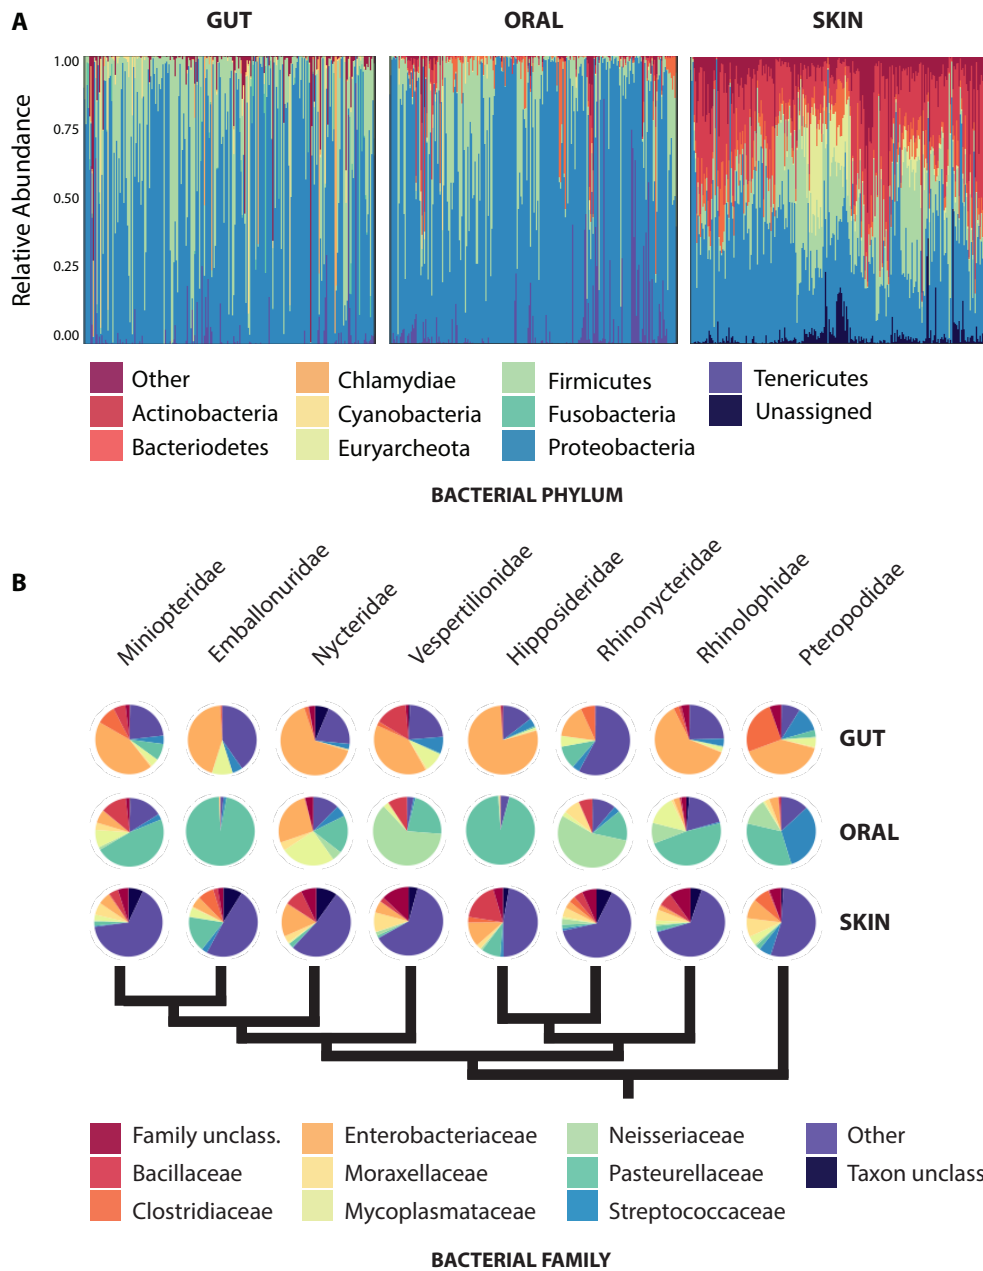

FIGURE 4

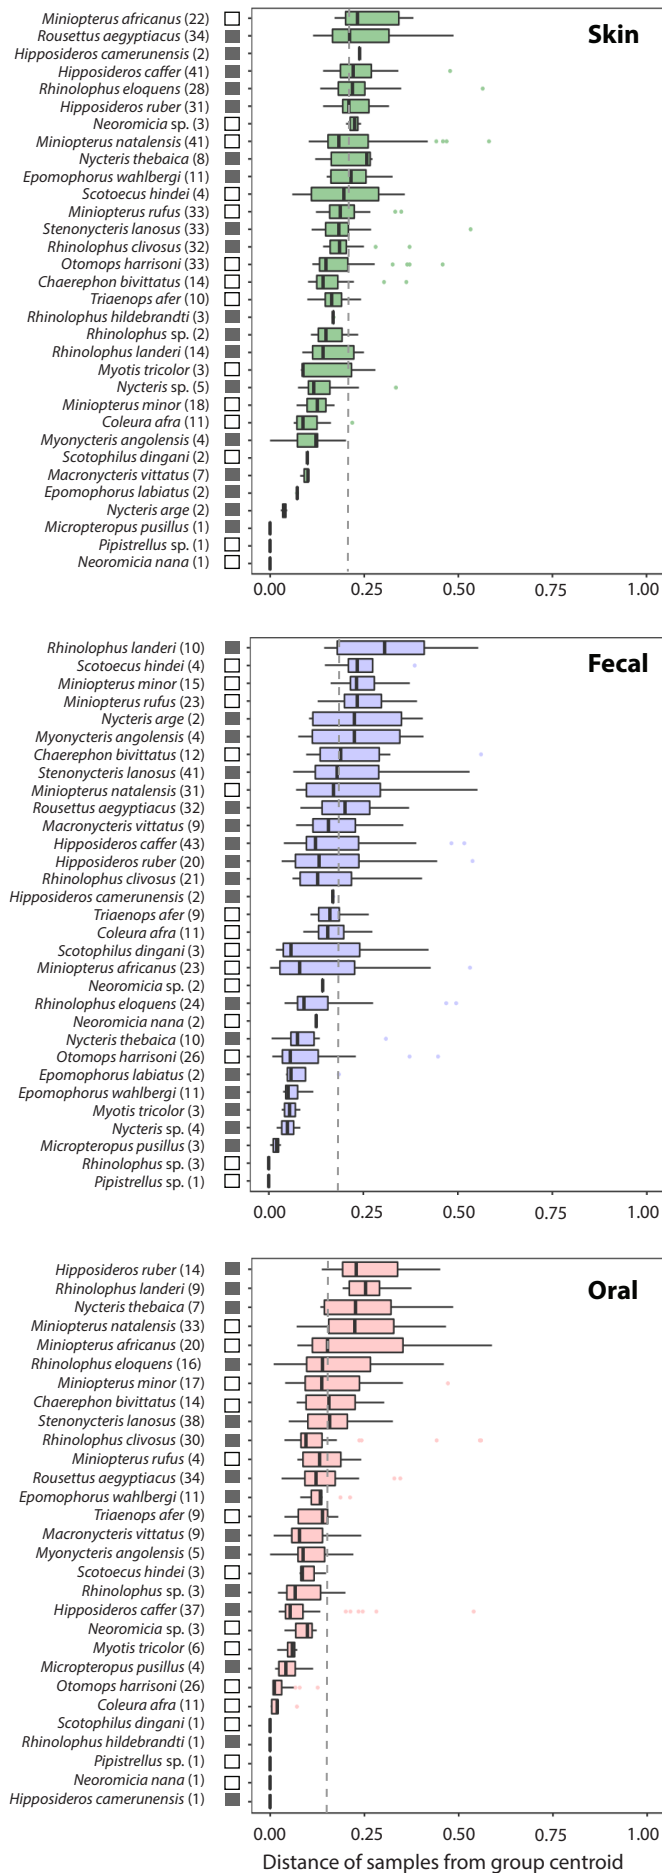

FIGURE 5

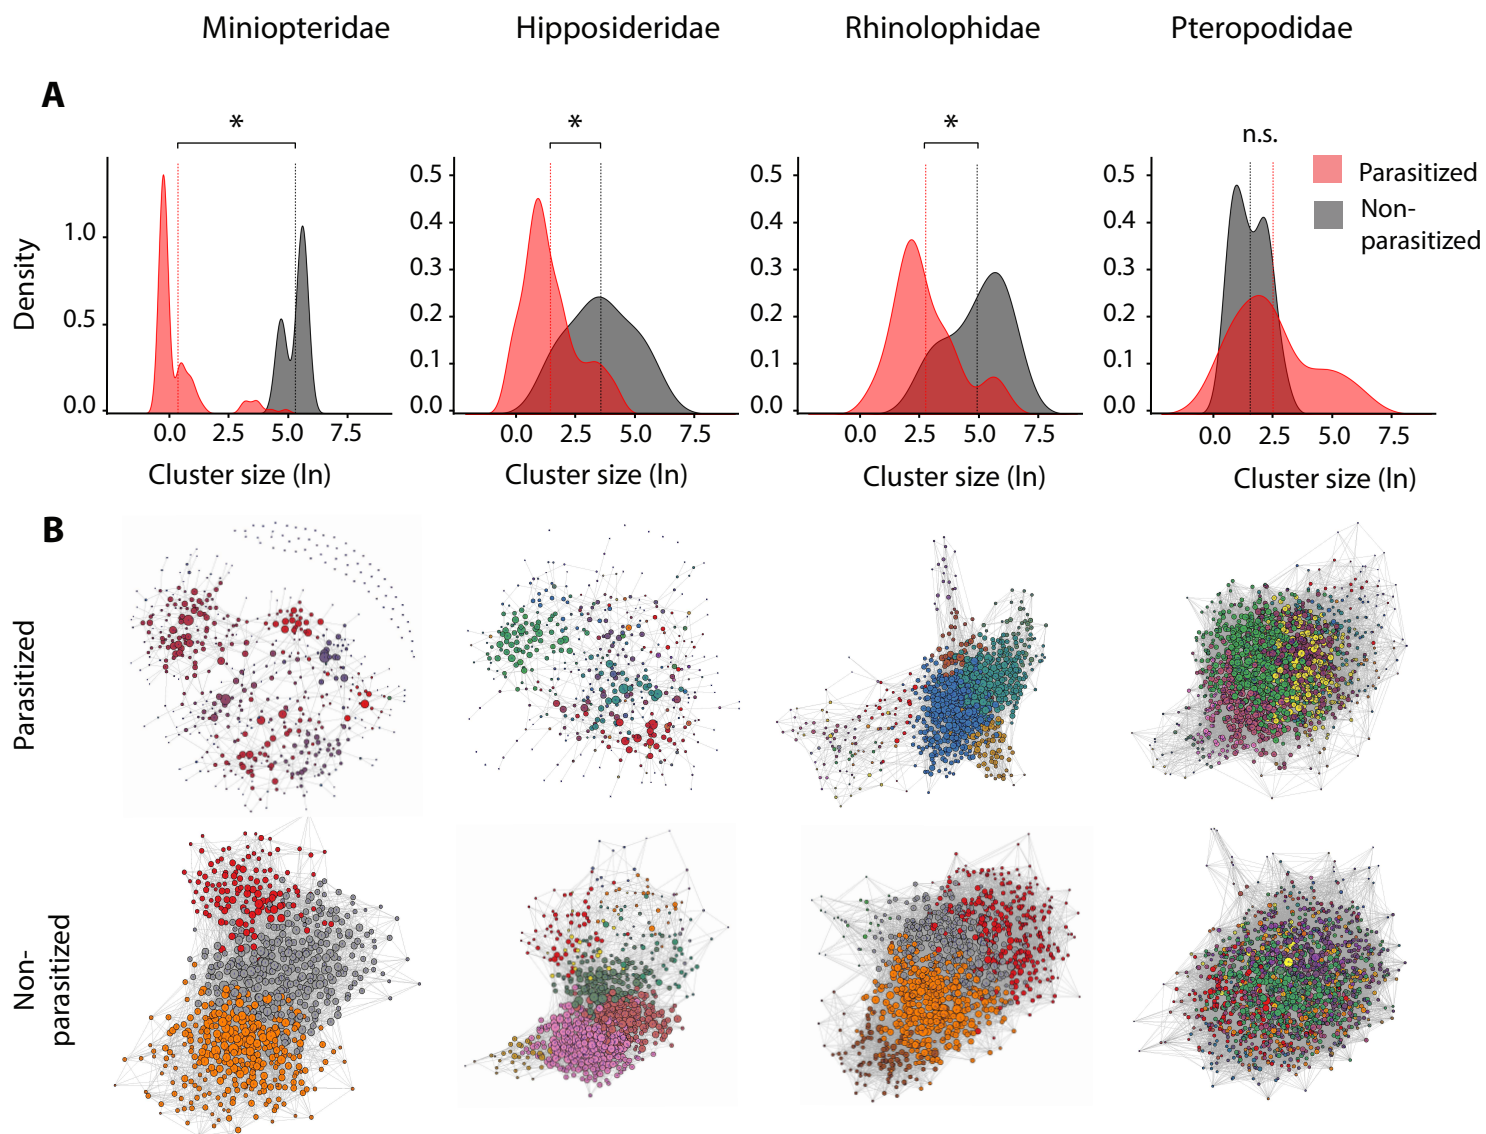

FIGURE 6

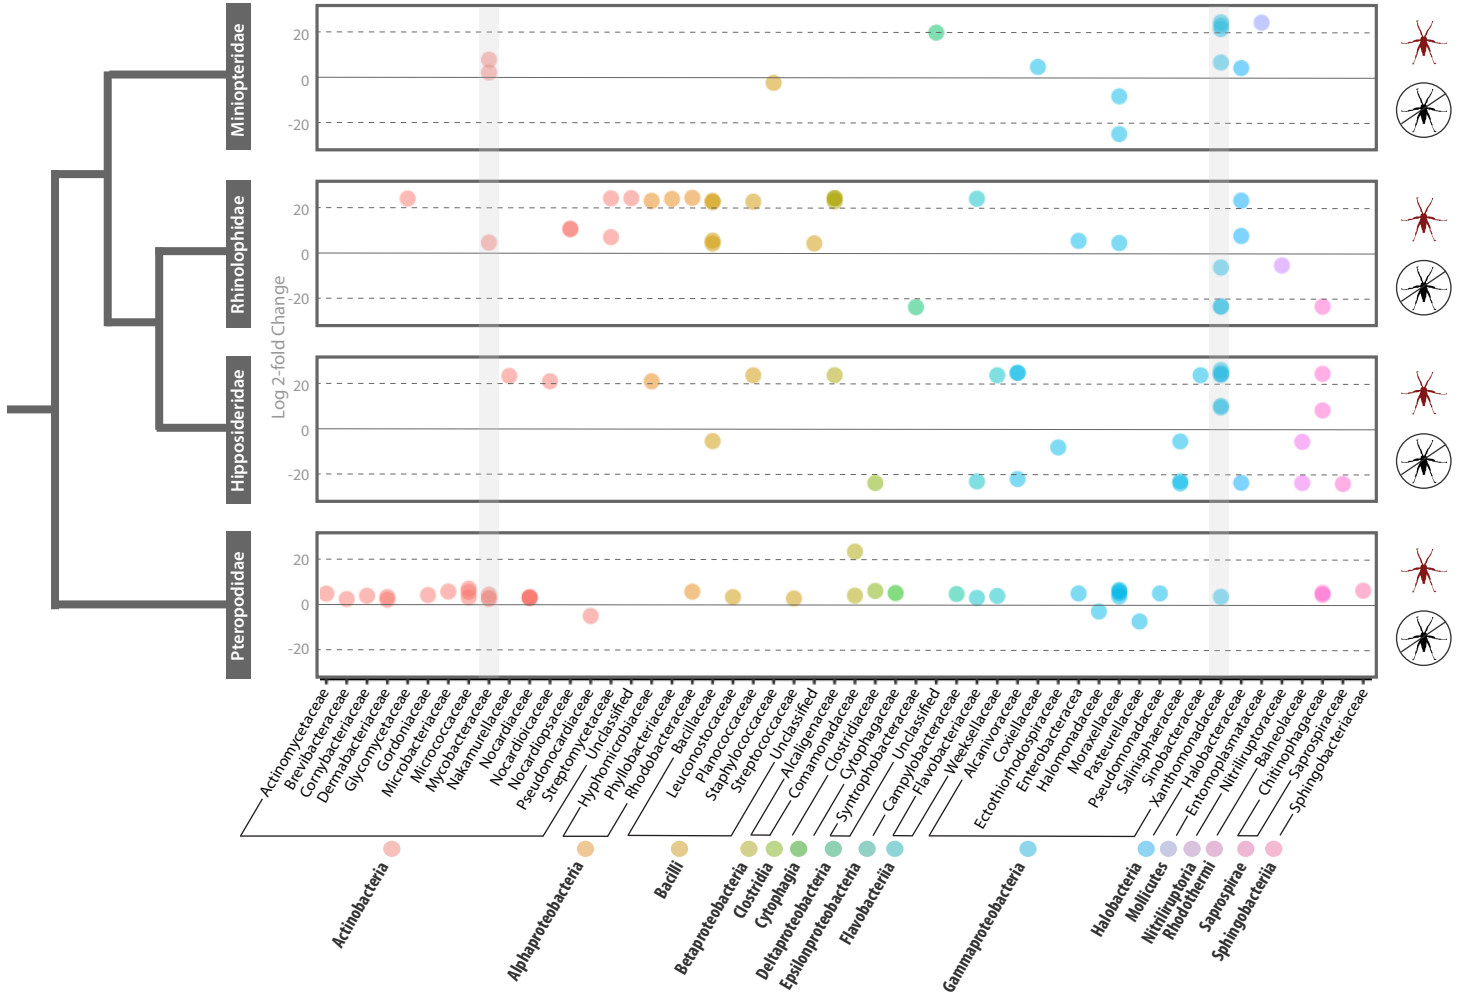

Figure S1. Measures of intraspecific beta dispersion among (A) unweighted UniFrac and (B) Bray-Curtis distances. Dotted gray line indicates mean beta dispersion for each anatomical group and dissimilarity measure.

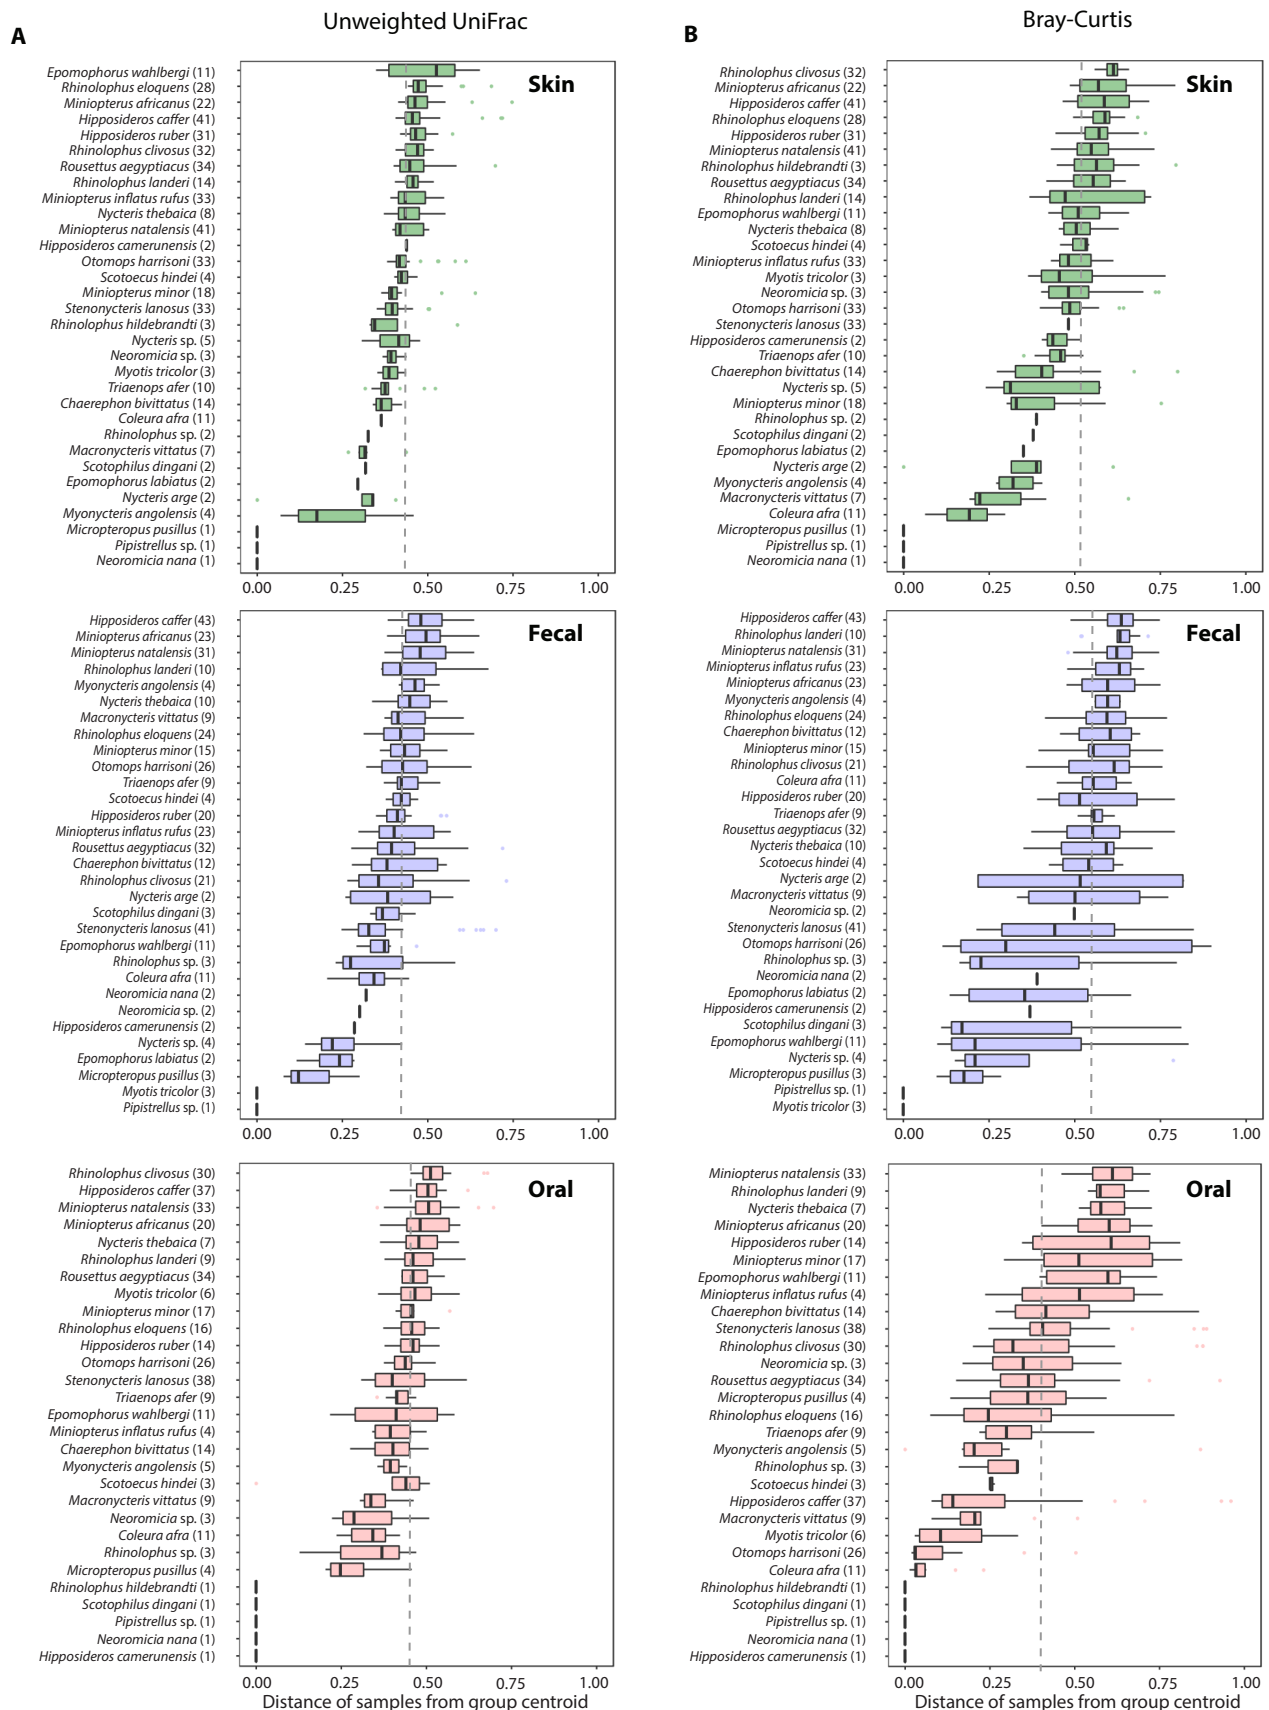

Figure S2. Linear regression of (A) Shannon diversity and (B) observed ESV richness of gut, oral, and skin microbiomes against elevation from which host was sampled (~0 - 2500 meters above sea level).  $R^2$  and significance values are provided within each plot.

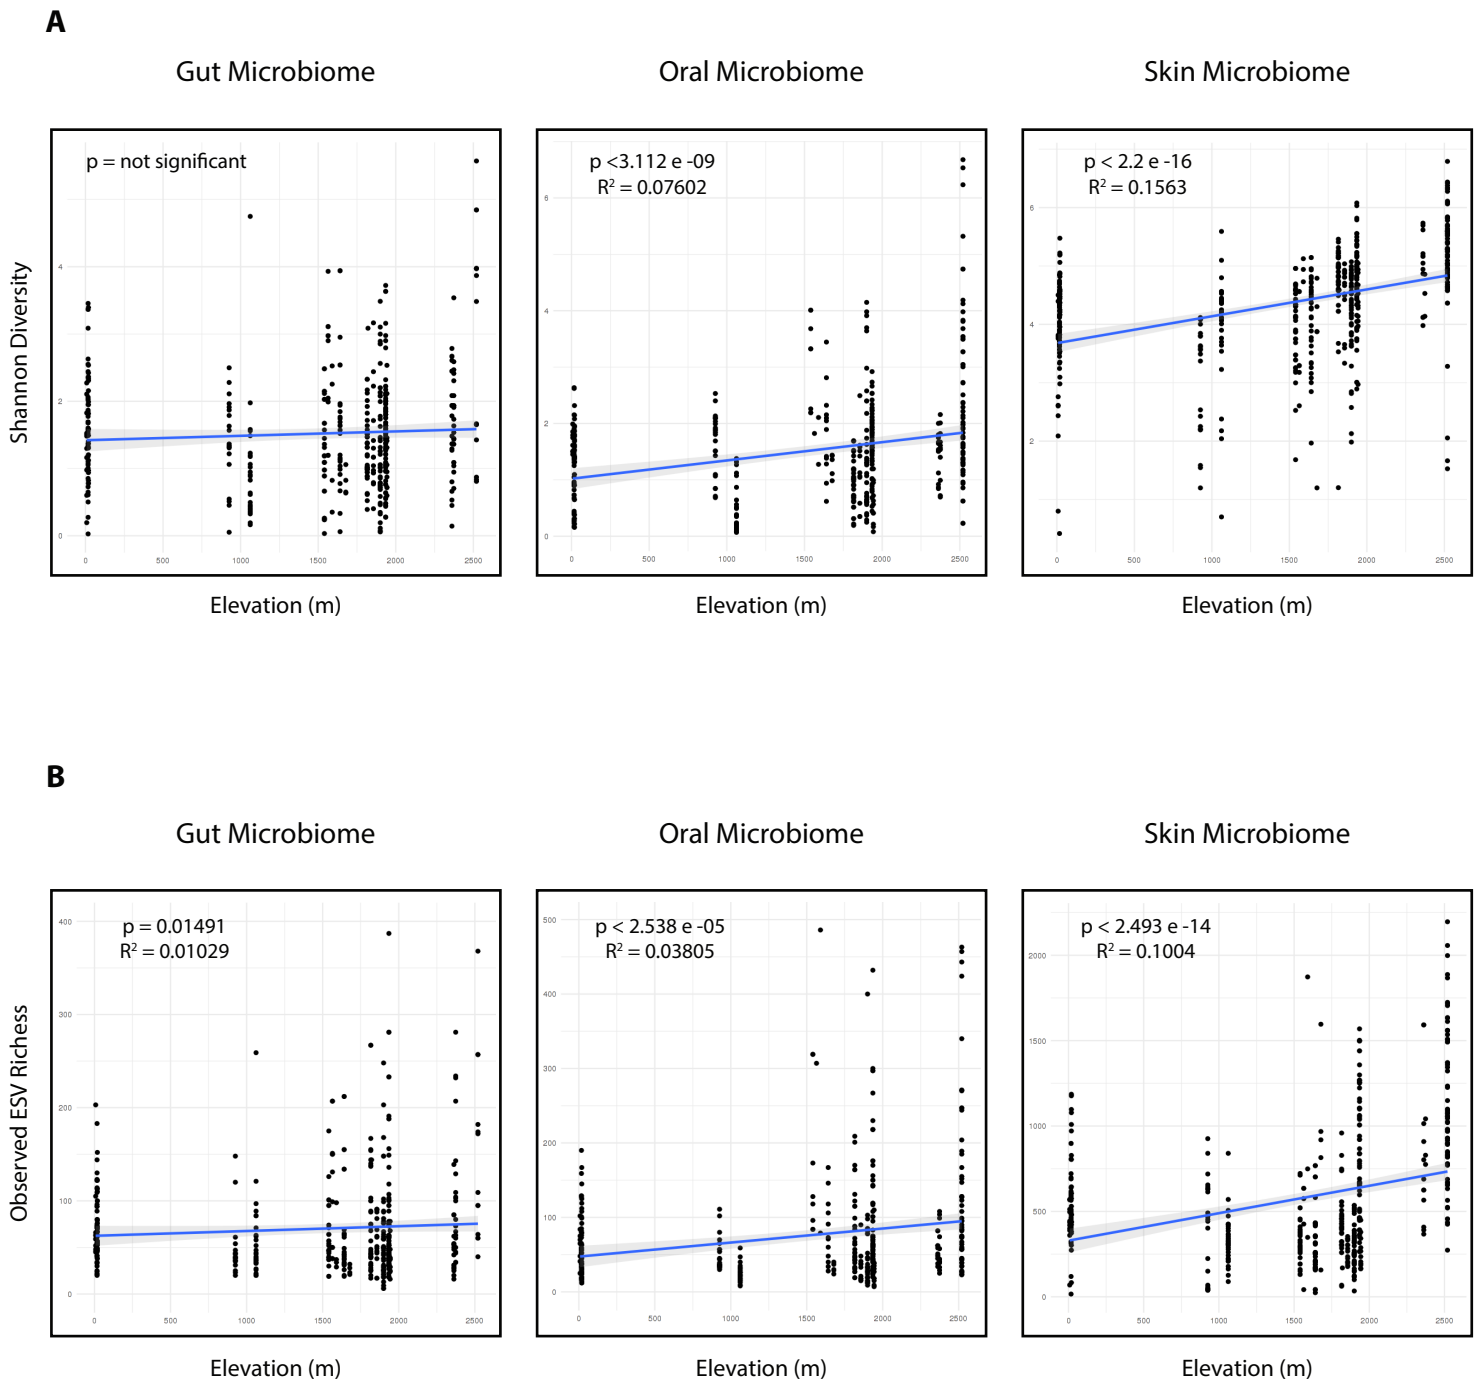

**Figure S3.A** Linear regression of patristic distances between microbial community dissimilarity (unweighted and weighted UniFrac) and phylogenetic distances between individual bat species sampled in this study.

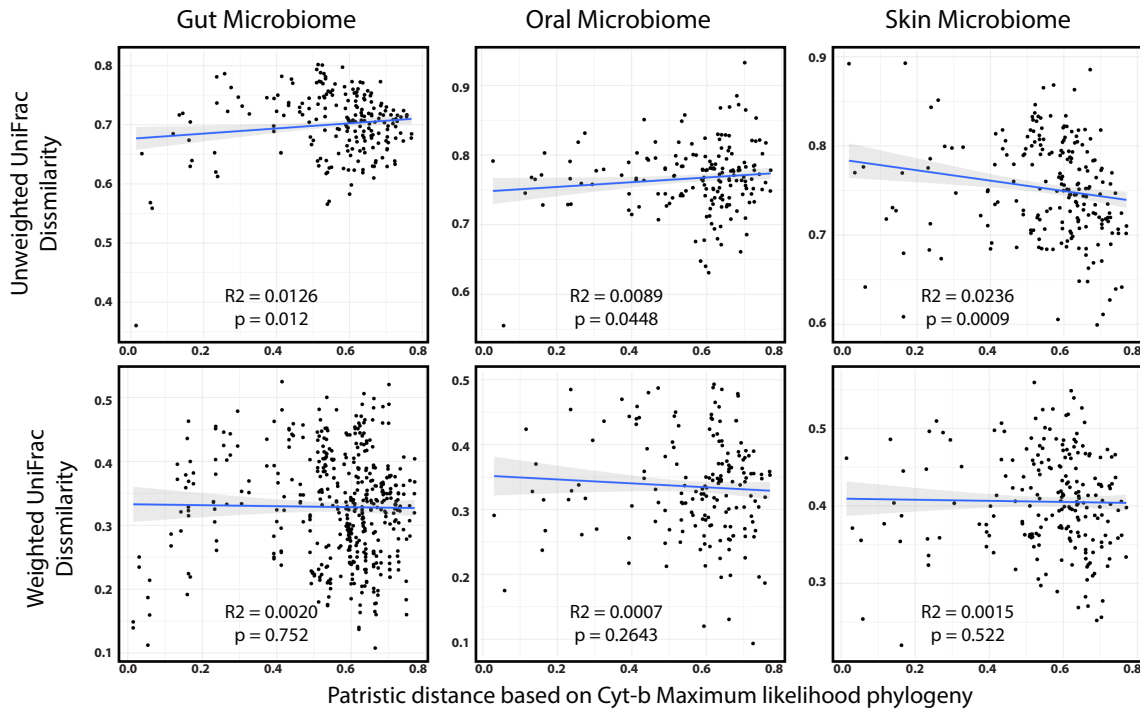

**Figure S3.B** Maximum likelihood phylogeny of bat species. Phylogenetic distances were calculated as patristic distances based on maximum likelihood reconstruction of bat species-level phylogeny with 1000 bootstrap (bs) replicates. Closed circles > 95% bs support, open black circles > 90% bs support, open gray circles >75% bs support.

Methods: DNA was extracted from pectoral muscle tissue of bat specimens, and sequenced for mitochondrial Cytochrome-b (cyt-b) using the primer pair LGL 765F and LGL 766R to amplify the entire cyt-b gene (1, 2). PCR amplification and sequencing were carried out as in Demos et al. (3). The best-supported model of nucleotide substitution for cyt-b was determined using the BIC on the maximum-likelihood topology estimated independently for each model in jMODELTEST2 (4) on CIPRES Science Gateway v.3.1 (5). Maximum-likelihood estimates of cyt-b gene trees and concatenated gene trees were made using the program RAxML-HPC v.8 (6) on the CIPRES portal. We conducted analyses using the rapid bootstrapping algorithm and searched for best-scoring ML tree algorithm under the GTRGAMMA model with 1000 bootstrap replicates (references listed on next page).

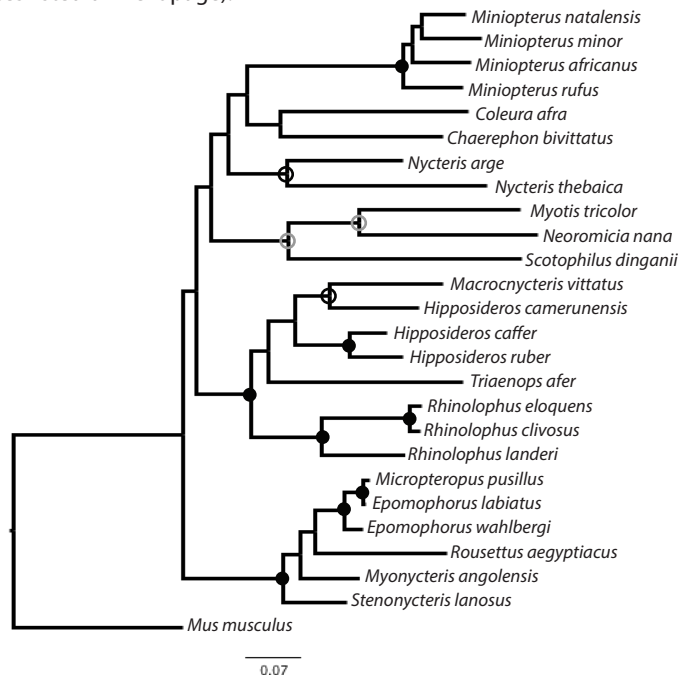

Figure S4. Network Analyses - (A) Node degree distribution of parasitized and non-parasitized bats, grouped by family. (B) Network fragility plots, showing natural network connectivity with sequential removal of nodes ordered by betweenness and degree.

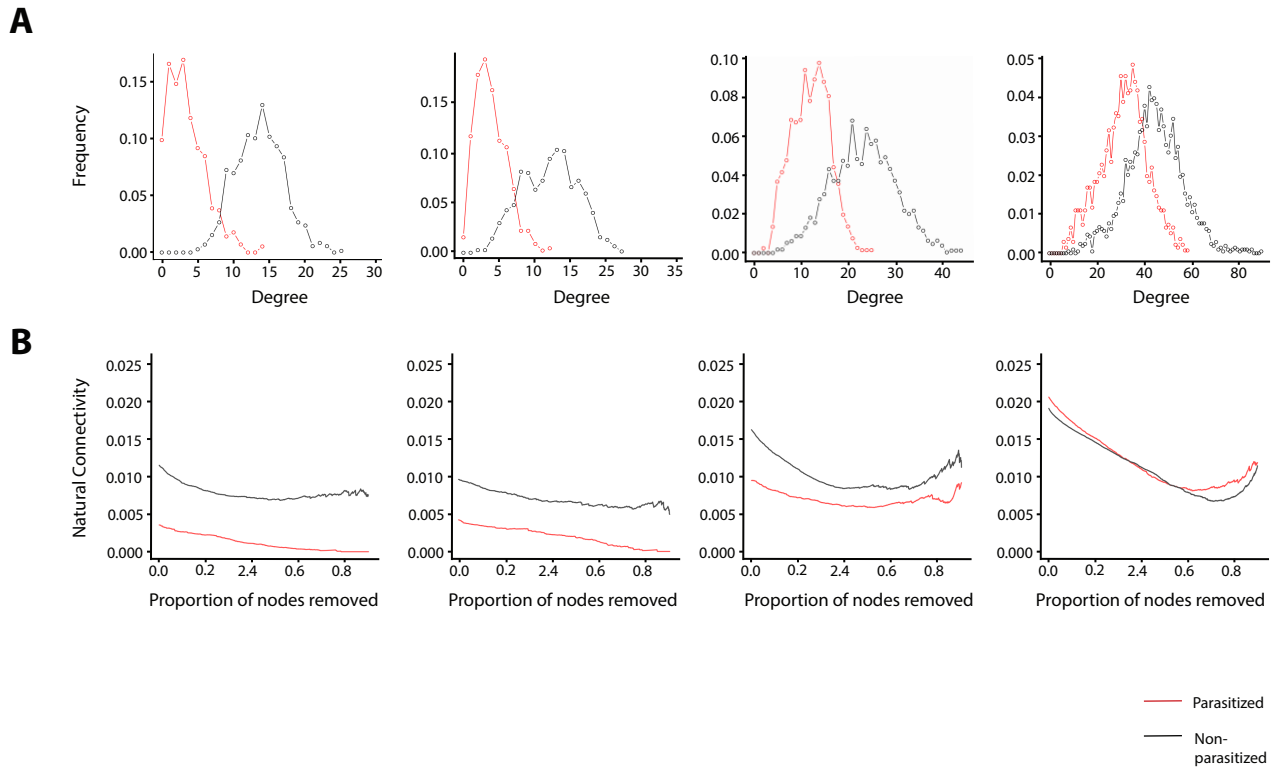



Table S1. Full sampling locality data. Loc\_name corresponds to map labels in main text, Figure 1.

| Loc_name   | Country | County      | Specific locality                                   | GPS Coordinates        | Elevation (m) |
|------------|---------|-------------|-----------------------------------------------------|------------------------|---------------|
| Acholi     | Uganda  | Acholi      | Agoro-Agu Forest Reserve                            | N 3.81039 E32.92264    | 1935          |
| Aringa     | Uganda  | Aringa      | Aringa Bridge                                       | N 3.71665 E 32.89481   | 926           |
| Chyulu     | Kenya   | Makueni     | Guano cave 3, Chyulu Hills National Park            | S 02.33952 E 037.70911 | 1062          |
| Lirhanda   | Kenya   | Kakamega    | Lirhanda cave, Kakamega Forest                      | N 00.21176 E 034.89856 | 1540          |
| Buzambuli  | Kenya   | Kakamega    | Buzambuli Trail 3, Kakamega Forest National Reserve | N 00.34375 E 034.85660 | 1564          |
| Ikhondo    | Kenya   | Kakamega    | Ikhondo Junction, Kakamega Forest National Reserve  | N 00.35293 E 034.86720 | 1590          |
| Buyangu    | Kenya   | Kakamega    | Buyangu KWS HQ, Kakamega Forest National Reserve    | N 00.35500 E 034.86567 | 1618          |
| Mahiakalo  | Kenya   | Kakamega    | Mahiakalo cave, Kakamega Forest                     | N 00.24454 E 034.90688 | 1641          |
| Kaptum     | Uganda  | Kaptum      | Kaptum Cave                                         | N 1.4474 E 34.5769     | 1678          |
| Karamoja   | Uganda  | Karamoja    | Mount Morungole                                     | N 03.81083 E 34.02931  | 2520          |
| Watamu     | Kenya   | Kilifi      | Watamu cave, Gede                                   | S 03.35109 E 040.01544 | 8             |
| Makuruhi   | Kenya   | Kilifi      | Makuruhi cave, Gede                                 | S 03.32319 E 040.04153 | 17            |
| Kaboga     | Kenya   | Kilifi      | Kaboga cave, Gede                                   | S 03.33452 E 040.03074 | 19            |
| Kitum      | Kenya   | Trans Nzoia | Kitum cave, Mount Elgon National Park               | N 01.02937 E 034.75580 | 2362          |
| Makingeny  | Kenya   | Trans Nzoia | Makingeny cave, Mount Elgon National Park           | N 01.03553 E 034.75305 | 2374          |
| Lionhill   | Kenya   | Nakuru      | Lion Hill cave, Lake Nakuru National Park           | S 00.34589 E 036.11918 | 1816          |
| Soysambu   | Kenya   | Nakuru      | Monkey Bridge campsite, Soysambu Conservancy        | S 00.39227 E 036.21117 | 1821          |
| Kariandusi | Kenya   | Nakuru      | Kariandusi mines, Gilgil                            | S 00.45143 E 036.28194 | 1856          |
| Diatomite  | Kenya   | Nakuru      | Diatomite cave, Gilgil                              | S 00.43010 E 036.17368 | 1900          |
| Pipeline   | Kenya   | Nakuru      | Pipeline cave, Gilgil                               | S 00.53911 E036.29431  | 1943          |













|            |           |            |                  |                |          |   |          |        |                                                    |      |    |    |      |   |                       |   |                |                         |
|------------|-----------|------------|------------------|----------------|----------|---|----------|--------|----------------------------------------------------|------|----|----|------|---|-----------------------|---|----------------|-------------------------|
| FMNH233880 | PWW.3445  | Chiroptera | Rhinolophidae    | Rhinolophus    | landeri  | F | Nakuru   | Kenya  | Kariandusi mines Gilgil                            | 1856 | 25 | 10 | 2016 | 0 | 0                     | 0 | 0              | 0                       |
| FMNH233881 | PWW.3446  | Chiroptera | Rhinolophidae    | Rhinolophus    | landeri  | F | Nakuru   | Kenya  | Kariandusi mines Gilgil                            | 1856 | 25 | 10 | 2016 | 0 | 0                     | 0 | 0              | 0                       |
| FMNH233882 | PWW.3447  | Chiroptera | Rhinolophidae    | Rhinolophus    | landeri  | F | Nakuru   | Kenya  | Kariandusi mines Gilgil                            | 1856 | 25 | 10 | 2016 | 0 | 0                     | 0 | 0              | 0                       |
| FMNH233824 | PWW.3355  | Chiroptera | Rhinolophidae    | Rhinolophus    | sp.      | F | Makueni  | Kenya  | Guano cave 3 Chyulu Hills National Park            | 1062 | 20 | 10 | 2016 | 0 | 0                     | 1 | Hippoboscidae  | Phthiridium hoogstraali |
| FMNH233823 | PWW.3354  | Chiroptera | Rhinolophidae    | Rhinolophus    | sp.      | M | Makueni  | Kenya  | Guano cave 3 Chyulu Hills National Park            | 1062 | 20 | 10 | 2016 | 0 | 0                     | 0 | 0              | 0                       |
| FMNH233825 | PWW.3357  | Chiroptera | Rhinolophidae    | Rhinolophus    | sp.      | M | Makueni  | Kenya  | Guano cave 3 Chyulu Hills National Park            | 1062 | 20 | 10 | 2016 | 0 | 0                     | 0 | 0              | 0                       |
| FMNH234082 | PWW.3369  | Chiroptera | Rhinonycteridae  | Trienops       | afes     | F | Kilifi   | Kenya  | Makuruhi cave Gede                                 | 17   | 21 | 10 | 2016 | 0 | 0                     | 0 | 0              | 0                       |
| FMNH234086 | PWW.3373  | Chiroptera | Rhinonycteridae  | Trienops       | afes     | F | Kilifi   | Kenya  | Makuruhi cave Gede                                 | 17   | 21 | 10 | 2016 | 0 | 0                     | 1 | Streblidae     | Raymondia sp.           |
| FMNH234088 | PWW.3375  | Chiroptera | Rhinonycteridae  | Trienops       | afes     | F | Kilifi   | Kenya  | Makuruhi cave Gede                                 | 17   | 21 | 10 | 2016 | 0 | 0                     | 1 | Streblidae     | Raymondia sp.           |
| FMNH234090 | PWW.3377  | Chiroptera | Rhinonycteridae  | Trienops       | afes     | F | Kilifi   | Kenya  | Makuruhi cave Gede                                 | 17   | 21 | 10 | 2016 | 0 | 0                     | 1 | Streblidae     | Raymondia sp.           |
| FMNH234091 | PWW.3378  | Chiroptera | Rhinonycteridae  | Trienops       | afes     | F | Kilifi   | Kenya  | Makuruhi cave Gede                                 | 17   | 21 | 10 | 2016 | 1 | 0                     | 1 | Streblidae     | Raymondia sp.           |
| FMNH234083 | PWW.3370  | Chiroptera | Rhinonycteridae  | Trienops       | afes     | M | Kilifi   | Kenya  | Makuruhi cave Gede                                 | 17   | 21 | 10 | 2016 | 0 | 0                     | 0 | 0              | 0                       |
| FMNH234085 | PWW.3372  | Chiroptera | Rhinonycteridae  | Trienops       | afes     | M | Kilifi   | Kenya  | Makuruhi cave Gede                                 | 17   | 21 | 10 | 2016 | 0 | 0                     | 1 | 0              | 0                       |
| FMNH234089 | PWW.3376  | Chiroptera | Rhinonycteridae  | Trienops       | afes     | M | Kilifi   | Kenya  | Makuruhi cave Gede                                 | 17   | 21 | 10 | 2016 | 0 | 0                     | 1 | Macronyssidae  | Macronyssidae           |
| FMNH234084 | PWW.3371  | Chiroptera | Rhinonycteridae  | Trienops       | afes     | M | Kilifi   | Kenya  | Makuruhi cave Gede                                 | 17   | 21 | 10 | 2016 | 0 | 0                     | 1 | Streblidae     | Raymondia sp.           |
| FMNH234087 | PWW.3374  | Chiroptera | Rhinonycteridae  | Trienops       | afes     | M | Kilifi   | Kenya  | Makuruhi cave Gede                                 | 17   | 21 | 10 | 2016 | 0 | 0                     | 1 | Streblidae     | Raymondia sp.           |
| FMNH232112 | JCK.10026 | Chiroptera | Vespertilionidae | Myotis         | tricolor | F | Karamoja | Uganda | Mount Morungole                                    | 2520 | 25 | 7  | 2016 | 0 | 0                     | 1 | Nycteribiidae  | Nycteribia latiterna    |
| FMNH232118 | JCK.10139 | Chiroptera | Vespertilionidae | Myotis         | tricolor | F | Karamoja | Uganda | Mount Morungole                                    | 2520 | 28 | 7  | 2016 | 1 | Polychromophilus muri | 1 | Nycteribiidae  | Nycteribia latiterna    |
| FMNH232117 | JCK.10072 | Chiroptera | Vespertilionidae | Myotis         | tricolor | M | Karamoja | Uganda | Mount Morungole                                    | 2520 | 26 | 7  | 2016 | 0 | 0                     | 1 | 0              | 0                       |
| FMNH232119 | JCK.10259 | Chiroptera | Vespertilionidae | Myotis         | tricolor | M | Karamoja | Uganda | Mount Morungole                                    | 2520 | 1  | 8  | 2016 | 0 | 0                     | 1 | Ixodidae       | Ixodidae                |
| FMNH232111 | JCK.10025 | Chiroptera | Vespertilionidae | Myotis         | tricolor | M | Karamoja | Uganda | Mount Morungole                                    | 2520 | 25 | 7  | 2016 | 1 | Polychromophilus muri | 1 | Nycteribiidae  | Nycteribia latiterna    |
| FMNH232113 | JCK.10028 | Chiroptera | Vespertilionidae | Myotis         | tricolor | M | Karamoja | Uganda | Mount Morungole                                    | 2520 | 26 | 7  | 2016 | 1 | Polychromophilus muri | 1 | Nycteribiidae  | Nycteribia latiterna    |
| FMNH232114 | JCK.10029 | Chiroptera | Vespertilionidae | Myotis         | tricolor | M | Karamoja | Uganda | Mount Morungole                                    | 2520 | 26 | 7  | 2016 | 0 | 0                     | 1 | Nycteribiidae  | Nycteribia latiterna    |
| FMNH232115 | JCK.10030 | Chiroptera | Vespertilionidae | Myotis         | tricolor | M | Karamoja | Uganda | Mount Morungole                                    | 2520 | 26 | 7  | 2016 | 0 | 0                     | 1 | Nycteribiidae  | Nycteribia latiterna    |
| FMNH232116 | JCK.10031 | Chiroptera | Vespertilionidae | Myotis         | tricolor | M | Karamoja | Uganda | Mount Morungole                                    | 2520 | 26 | 7  | 2016 | 0 | 0                     | 1 | Nycteribiidae  | Nycteribia latiterna    |
| FMNH234713 | PWW.3617  | Chiroptera | Vespertilionidae | Neoromicia     | nana     | M | Kakamega | Kenya  | Ikhondo Junction Kakamega Forest National Reserve  | 1590 | 1  | 11 | 2016 | 0 | 0                     | 0 | 0              | 0                       |
| FMNH234596 | PWW.3439  | Chiroptera | Vespertilionidae | Neoromicia     | sp.      | F | Kilifi   | Kenya  | Kaboga cave Gede                                   | 19   | 22 | 10 | 2016 | 0 | 0                     | 0 | 0              | 0                       |
| FMNH234597 | PWW.3440  | Chiroptera | Vespertilionidae | Neoromicia     | sp.      | F | Kilifi   | Kenya  | Kaboga cave Gede                                   | 19   | 22 | 10 | 2016 | 0 | 0                     | 0 | 0              | 0                       |
| FMNH234598 | PWW.3443  | Chiroptera | Vespertilionidae | Neoromicia     | sp.      | M | Kilifi   | Kenya  | Kaboga cave Gede                                   | 19   | 22 | 10 | 2016 | 0 | 0                     | 0 | 0              | 0                       |
| FMNH232432 | JCK.10376 | Chiroptera | Vespertilionidae | Pipistrellus   | sp.      | F | Acholi   | Uganda | Agoro-Agu Forest Reserve                           | 1935 | 9  | 8  | 2016 | 0 | 0                     | 1 | 0              | 0                       |
| FMNH232514 | JCK.10396 | Chiroptera | Vespertilionidae | Scotoecus      | hindei   | F | Acholi   | Uganda | Agoro-Agu Forest Reserve                           | 1935 | 11 | 8  | 2016 | 0 | 0                     | 0 | 0              | 0                       |
| FMNH232516 | JCK.10398 | Chiroptera | Vespertilionidae | Scotoecus      | hindei   | F | Acholi   | Uganda | Agoro-Agu Forest Reserve                           | 1935 | 11 | 8  | 2016 | 0 | 0                     | 0 | 0              | 0                       |
| FMNH232513 | JCK.10356 | Chiroptera | Vespertilionidae | Scotoecus      | hindei   | F | Acholi   | Uganda | Agoro-Agu Forest Reserve                           | 1935 | 9  | 8  | 2016 | 0 | 0                     | 1 | Hippoboscidae  | Basilia ansifera        |
| FMNH232515 | JCK.10397 | Chiroptera | Vespertilionidae | Scotoecus      | hindei   | M | Acholi   | Uganda | Agoro-Agu Forest Reserve                           | 1935 | 11 | 8  | 2016 | 0 | 0                     | 0 | 0              | 0                       |
| FMNH234475 | PWW.3602  | Chiroptera | Vespertilionidae | Scotophilus    | dingani  | F | Kakamega | Kenya  | Buzambuli Trail 3 Kakamega Forest National Reserve | 1564 | 31 | 10 | 2016 | 0 | 0                     | 0 | 0              | 0                       |
| FMNH234476 | PWW.3616  | Chiroptera | Vespertilionidae | Scotophilus    | dingani  | M | Kakamega | Kenya  | Ikhondo Junction Kakamega Forest National Reserve  | 1590 | 1  | 11 | 2016 | 0 | 0                     | 0 | 0              | 0                       |
| FMNH234474 | PWW.3441  | Chiroptera | Vespertilionidae | Scotophilus    | dingani  | F | Kilifi   | Kenya  | Kaboga cave Gede                                   | 19   | 22 | 10 | 2016 | 0 | 0                     | 1 | Nycteribiidae  | Nycteribia schmidlii    |
| FMNH232110 | JCK.10180 | Chiroptera | Vespertilionidae | Vespertilionid | sp.      | M | Karamoja | Uganda | Mount Morungole                                    | 2520 | 30 | 7  | 2016 | 0 | 0                     | 0 | Spinturnicidae | Spinturnicidae          |



Table S3. DESeq results: ESVs from the skin that were identified as significantly enriched in either non-ectoparasitized (positive log2FoldChange values; black or ectoparasitized (negative log2FoldChange values; red) bats.

| Host_family    | baseMean   | log2FoldChange | lfcSE       | stat       | pvalue     | padj       | Rank1    | Rank2          | Rank3               | Rank4             | Rank5                  | Rank6               | Rank7        |
|----------------|------------|----------------|-------------|------------|------------|------------|----------|----------------|---------------------|-------------------|------------------------|---------------------|--------------|
| Hipposideridae | 33.3360233 | -25.65717963   | 2.84165626  | -9.0289526 | 1.73E-19   | 4.77E-17   | Bacteria | Bacteroidetes  | [Saprosirae]        | [Saprosirales]    | Saprosiraceae          | Unclassified        | Unclassified |
| Hipposideridae | 24.9053051 | -25.44743324   | 2.961084869 | -8.5939561 | 8.40E-18   | 1.54E-15   | Bacteria | Proteobacteria | Gammaproteobacteria | Salinisphaerales  | Salinisphaeraceae      | Salinisphaera       | Unclassified |
| Hipposideridae | 21.6441823 | -25.2429634    | 2.961117027 | -8.5248111 | 1.53E-17   | 2.68E-15   | Bacteria | Bacteroidetes  | [Rhodothermi]       | [Rhodothermales]  | [Balneolaceae]         | KSA1                | Unclassified |
| Hipposideridae | 35.4879494 | -25.2388568    | 2.420732479 | -10.426124 | 1.88E-25   | 3.63E-22   | Bacteria | Firmicutes     | Clostridia          | Clostridiales     | Clostridiaceae         | Unclassified        | Unclassified |
| Hipposideridae | 20.5283726 | -25.17048193   | 2.799904489 | -8.9897645 | 2.48E-19   | 6.36E-17   | Archaea  | Euryarchaeota  | Halobacteria        | Halobacteriales   | Halobacteriaceae       | Natronomonas        | Unclassified |
| Hipposideridae | 33.6261871 | -24.50404309   | 2.849792516 | -8.5985358 | 8.07E-18   | 1.54E-15   | Bacteria | Bacteroidetes  | Flavobacteriia      | Flavobacteriales  | Flavobacteriaceae      | Unclassified        | Unclassified |
| Hipposideridae | 11.6313092 | -24.40177521   | 2.306373551 | -10.580149 | 3.68E-26   | 1.42E-22   | Bacteria | Proteobacteria | Gammaproteobacteria | Salinisphaerales  | Salinisphaeraceae      | Salinisphaera       | Unclassified |
| Hipposideridae | 5.78175293 | -23.45826935   | 2.497594017 | -9.3923469 | 5.87E-21   | 3.23E-18   | Bacteria | Proteobacteria | Gammaproteobacteria | Oceanospirillales | Alcanivoracaceae       | Alcanivorax         | Unclassified |
| Hipposideridae | 44.391983  | -9.110914131   | 2.339431242 | -3.8944996 | 9.84E-05   | 0.01148019 | Bacteria | Proteobacteria | Gammaproteobacteria | Chromatiales      | Ectothiorhodospiraceae | Unclassified        | Unclassified |
| Hipposideridae | 277.237854 | -6.60493886    | 1.518580924 | -4.3494151 | 1.37E-05   | 0.00175176 | Bacteria | Bacteroidetes  | [Rhodothermi]       | [Rhodothermales]  | [Balneolaceae]         | KSA1                | Unclassified |
| Hipposideridae | 70.8563568 | -6.389388446   | 1.413078047 | -4.5216104 | 6.14E-06   | 0.00081475 | Bacteria | Proteobacteria | Gammaproteobacteria | Salinisphaerales  | Salinisphaeraceae      | Salinisphaera       | Unclassified |
| Hipposideridae | 403.611788 | -6.270630576   | 1.107148163 | -5.6637682 | 1.48E-08   | 2.28E-06   | Bacteria | Firmicutes     | Bacilli             | Bacillales        | Bacillaceae            | Unclassified        | Unclassified |
| Hipposideridae | 44.8861438 | 7.644821161    | 1.885374384 | 4.05480271 | 5.02E-05   | 0.00615871 | Bacteria | Bacteroidetes  | [Saprosirae]        | [Saprosirales]    | Chitinophagaceae       | Unclassified        | Unclassified |
| Hipposideridae | 15.8097063 | 9.002077621    | 2.222664025 | 4.05012972 | 5.12E-05   | 0.00615871 | Bacteria | Proteobacteria | Gammaproteobacteria | Xanthomonadales   | Xanthomonadaceae       | Luteibacter         | rhizovicinus |
| Hipposideridae | 36.9729559 | 9.667104592    | 2.044794813 | 4.72766486 | 2.27E-06   | 0.00032385 | Bacteria | Proteobacteria | Gammaproteobacteria | Xanthomonadales   | Xanthomonadaceae       | Unclassified        | Unclassified |
| Hipposideridae | 0.89485376 | 20.86870844    | 2.959888545 | 7.05050482 | 1.78E-12   | 2.86E-10   | Bacteria | Actinobacteria | Actinobacteria      | Actinomycetales   | Nocardiodiaceae        | Unclassified        | Unclassified |
| Hipposideridae | 0.89485376 | 20.86870883    | 2.959888544 | 7.05050495 | 1.78E-12   | 2.86E-10   | Bacteria | Proteobacteria | Alphaproteobacteria | Rhizobiales       | Hyphomicrobiaceae      | Devosia             | Unclassified |
| Hipposideridae | 4.93611809 | 23.27919885    | 2.527845745 | 9.20910578 | 3.29E-20   | 1.06E-17   | Bacteria | Actinobacteria | Actinobacteria      | Actinomycetales   | Nakamurellaceae        | Unclassified        | Unclassified |
| Hipposideridae | 6.0392616  | 23.56015701    | 2.546061692 | 9.25356879 | 2.17E-20   | 8.36E-18   | Bacteria | Firmicutes     | Bacilli             | Bacillales        | Planococcaceae         | Unclassified        | Unclassified |
| Hipposideridae | 6.15431009 | 23.58277186    | 2.72388647  | 8.65776607 | 4.81E-18   | 9.75E-16   | Bacteria | Bacteroidetes  | Flavobacteriia      | Flavobacteriales  | [Weeksellaceae]        | Unclassified        | Unclassified |
| Hipposideridae | 6.20940611 | 23.59952012    | 2.545088156 | 9.27257473 | 1.82E-20   | 7.77E-18   | Bacteria | Proteobacteria | Gammaproteobacteria | Xanthomonadales   | Sinobacteraceae        | Unclassified        | Unclassified |
| Hipposideridae | 7.48028504 | 23.62760844    | 2.562780411 | 9.21952124 | 2.98E-20   | 1.04E-17   | Bacteria | Proteobacteria | Betaproteobacteria  | Burkholderiales   | Alcaligenaceae         | Unclassified        | Unclassified |
| Hipposideridae | 6.8718056  | 23.73606007    | 2.731340242 | 8.69026118 | 3.62E-18   | 7.73E-16   | Bacteria | Proteobacteria | Gammaproteobacteria | Xanthomonadales   | Xanthomonadaceae       | Unclassified        | Unclassified |
| Hipposideridae | 8.66930761 | 24.05903572    | 2.574969728 | 9.3432468  | 9.33E-21   | 4.49E-18   | Bacteria | Proteobacteria | Gammaproteobacteria | Xanthomonadales   | Xanthomonadaceae       | Unclassified        | Unclassified |
| Hipposideridae | 10.1050997 | 24.23263237    | 2.758293021 | 8.78537276 | 1.56E-18   | 3.53E-16   | Bacteria | Bacteroidetes  | [Saprosirae]        | [Saprosirales]    | Chitinophagaceae       | Unclassified        | Unclassified |
| Hipposideridae | 11.7961065 | 24.49313991    | 2.767890018 | 8.84902931 | 8.83E-19   | 2.12E-16   | Bacteria | Proteobacteria | Gammaproteobacteria | Xanthomonadales   | Xanthomonadaceae       | Unclassified        | Unclassified |
| Hipposideridae | 13.3303502 | 24.62715736    | 2.597856709 | 9.4797982  | 2.55E-21   | 1.63E-18   | Bacteria | Proteobacteria | Gammaproteobacteria | Oceanospirillales | Alcanivoracaceae       | Alcanivorax         | Unclassified |
| Hipposideridae | 15.0738992 | 24.73109623    | 2.44240381  | 10.1257196 | 4.25E-24   | 4.09E-21   | Bacteria | Proteobacteria | Gammaproteobacteria | Oceanospirillales | Alcanivoracaceae       | Alcanivorax         | Unclassified |
| Hipposideridae | 33.8904008 | 25.96995682    | 2.521288461 | 10.300272  | 7.03E-25   | 9.02E-22   | Bacteria | Proteobacteria | Gammaproteobacteria | Xanthomonadales   | Xanthomonadaceae       | Unclassified        | Unclassified |
| Miniopterus    | 9.91594853 | -25.58567541   | 2.017479186 | -12.682002 | 7.44E-37   | 1.13E-33   | Bacteria | Proteobacteria | Gammaproteobacteria | Pseudomonadales   | Moraxellaceae          | Alkanindiges        | Unclassified |
| Miniopterus    | 9.86344729 | -8.50285269    | 2.025199058 | -4.1985269 | 2.69E-05   | 0.00870641 | Bacteria | Proteobacteria | Gammaproteobacteria | Pseudomonadales   | Moraxellaceae          | Acinetobacter       | Unclassified |
| Miniopterus    | 606.594629 | -2.376277139   | 0.559035525 | -4.2506729 | 2.13E-05   | 0.00743821 | Bacteria | Firmicutes     | Bacilli             | Bacillales        | Staphylococcaceae      | Staphylococcus      | Unclassified |
| Miniopterus    | 475.832275 | 2.315050715    | 0.485464246 | 4.76873577 | 1.85E-06   | 0.00076463 | Bacteria | Actinobacteria | Actinobacteria      | Actinomycetales   | Mycobacteriaceae       | Mycobacterium       | Unclassified |
| Miniopterus    | 92.5081738 | 4.319454662    | 1.138716109 | 3.79326737 | 0.00014868 | 0.04497011 | Archaea  | Euryarchaeota  | Halobacteria        | Halobacteriales   | Halobacteriaceae       | Halococcus          | Unclassified |
| Miniopterus    | 96.4689286 | 4.819654198    | 1.073981799 | 4.4876498  | 7.20E-06   | 0.00272717 | Bacteria | Proteobacteria | Gammaproteobacteria | Legionellales     | Coxiellaceae           | Rickettsiella       | Unclassified |
| Miniopterus    | 16.2221811 | 6.873850559    | 1.233974991 | 5.57049422 | 2.54E-08   | 1.15E-05   | Bacteria | Proteobacteria | Gammaproteobacteria | Xanthomonadales   | Xanthomonadaceae       | Unclassified        | Unclassified |
| Miniopterus    | 59.749205  | 8.111218933    | 1.329825481 | 6.09946121 | 1.06E-09   | 5.37E-07   | Bacteria | Actinobacteria | Actinobacteria      | Actinomycetales   | Mycobacteriaceae       | Mycobacterium       | Unclassified |
| Miniopterus    | 0.98024775 | 20.38460648    | 2.931930405 | 6.9526229  | 3.59E-12   | 2.03E-09   | Bacteria | Proteobacteria | Deltaproteobacteria | Myxococcales      | unclassified           | Unclassified        | Unclassified |
| Miniopterus    | 15.314646  | 21.98481035    | 1.96908894  | 11.16496   | 6.05E-29   | 5.49E-26   | Bacteria | Proteobacteria | Gammaproteobacteria | Xanthomonadales   | Xanthomonadaceae       | Unclassified        | Unclassified |
| Miniopterus    | 46.8275783 | 23.45661248    | 1.763147258 | 13.3038306 | 2.20E-40   | 4.99E-37   | Bacteria | Proteobacteria | Gammaproteobacteria | Xanthomonadales   | Xanthomonadaceae       | Unclassified        | Unclassified |
| Miniopterus    | 10.2817702 | 23.72426544    | 2.024424912 | 11.7190148 | 1.02E-31   | 1.16E-28   | Bacteria | Cyanobacteria  | Chloroplast         | Stramenopiles     | unclassified           | Unclassified        | Unclassified |
| Miniopterus    | 29.1518671 | 24.8954245     | 2.440446386 | 10.2011766 | 1.96E-24   | 1.27E-21   | Bacteria | Tenericutes    | Mollicutes          | Entomoplasmatales | Entomoplasmataceae     | Entomoplasma        | Unclassified |
| Miniopterus    | 26.8833469 | 25.05865373    | 1.665395292 | 15.0466702 | 3.63E-51   | 1.65E-47   | Bacteria | Proteobacteria | Gammaproteobacteria | Xanthomonadales   | Xanthomonadaceae       | Unclassified        | Unclassified |
| Pteropodidae   | 197.918879 | -7.705987738   | 1.445731453 | -5.3301654 | 9.81E-08   | 4.38E-05   | Bacteria | Proteobacteria | Gammaproteobacteria | Pasteurellales    | Pasteurellaceae        | Avibacterium        | Unclassified |
| Pteropodidae   | 11.6562082 | -5.19327303    | 1.577955943 | -3.2911394 | 0.00099782 | 0.0306917  | Bacteria | Actinobacteria | Actinobacteria      | Actinomycetales   | Pseudonocardiaceae     | Actinomycetospora   | Unclassified |
| Pteropodidae   | 46.3280145 | -3.177959536   | 0.941405521 | -3.3757605 | 0.00073612 | 0.02626475 | Bacteria | Proteobacteria | Gammaproteobacteria | Oceanospirillales | Halomonadaceae         | Candidatus Portiera | Unclassified |
| Pteropodidae   | 222.317519 | 2.145584572    | 0.618996233 | 3.46623203 | 0.00052781 | 0.02264072 | Bacteria | Actinobacteria | Actinobacteria      | Actinomycetales   | Dermabacteraceae       | Brachy bacterium    | Unclassified |
| Pteropodidae   | 726.212554 | 2.457775804    | 0.700785138 | 3.50717455 | 0.00045289 | 0.02244331 | Bacteria | Actinobacteria | Actinobacteria      | Actinomycetales   | Brevibacteriaceae      | Brevibacterium      | aureum       |
| Pteropodidae   | 13.2685055 | 2.509635649    | 0.824569764 | 3.04356982 | 0.00233789 | 0.04739544 | Bacteria | Actinobacteria | Actinobacteria      | Actinomycetales   | Mycobacteriaceae       | Mycobacterium       | Unclassified |

|               |            |              |             |            |            |            |          |                |                       |                      |                      |                  |              |
|---------------|------------|--------------|-------------|------------|------------|------------|----------|----------------|-----------------------|----------------------|----------------------|------------------|--------------|
| Pteropodidae  | 372.152047 | 2.716938071  | 0.870978721 | 3.1194081  | 0.00181215 | 0.0413651  | Bacteria | Firmicutes     | Bacilli               | Lactobacillales      | Streptococcaceae     | Lactococcus      | garvieae     |
| Pteropodidae  | 151.569379 | 2.914848464  | 0.882657155 | 3.30235635 | 0.00095876 | 0.03054341 | Bacteria | Actinobacteria | Actinobacteria        | Actinomycetales      | Mycobacteriaceae     | Mycobacterium    | Unclassified |
| Pteropodidae  | 169.414871 | 2.947354462  | 0.768660819 | 3.83440197 | 0.00012587 | 0.01122762 | Bacteria | Actinobacteria | Actinobacteria        | Actinomycetales      | Nocardiaceae         | Rhodococcus      | Unclassified |
| Pteropodidae  | 26.3950706 | 2.995492927  | 0.915443259 | 3.2721776  | 0.00106723 | 0.03107064 | Bacteria | Bacteroidetes  | Flavobacteriia        | Flavobacteriales     | Flavobacteriaceae    | Unclassified     | Unclassified |
| Pteropodidae  | 41.0912537 | 3.061484864  | 0.845280699 | 3.62185588 | 0.0002925  | 0.01922586 | Bacteria | Actinobacteria | Actinobacteria        | Actinomycetales      | Nocardiaceae         | Rhodococcus      | fascians     |
| Pteropodidae  | 59.1688549 | 3.074215379  | 0.962941686 | 3.19252497 | 0.00141035 | 0.03787161 | Bacteria | Actinobacteria | Actinobacteria        | Actinomycetales      | Nocardiaceae         | Rhodococcus      | Unclassified |
| Pteropodidae  | 16.0799288 | 3.184695056  | 0.974251879 | 3.26886211 | 0.00107981 | 0.03107064 | Bacteria | Actinobacteria | Actinobacteria        | Actinomycetales      | Micrococcaceae       | Micrococcus      | Unclassified |
| Pteropodidae  | 9.96279949 | 3.352163162  | 1.00234675  | 3.34431489 | 0.00082486 | 0.02829906 | Bacteria | Firmicutes     | Bacilli               | Lactobacillales      | Leuconostocaceae     | Unclassified     | Unclassified |
| Pteropodidae  | 32.229834  | 3.388681904  | 0.985558957 | 3.43833505 | 0.0005853  | 0.0233889  | Bacteria | Actinobacteria | Actinobacteria        | Actinomycetales      | Nocardiaceae         | Nocardia         | Unclassified |
| Pteropodidae  | 98.8625562 | 3.419943337  | 1.062502587 | 3.21876236 | 0.00128745 | 0.03588771 | Bacteria | Actinobacteria | Actinobacteria        | Actinomycetales      | Dermabacteraceae     | Unclassified     | Unclassified |
| Pteropodidae  | 14.4704316 | 3.468398712  | 1.001388823 | 3.4635884  | 0.00053302 | 0.02264072 | Bacteria | Proteobacteria | Gammaproteobacteria   | Xanthomonadales      | Xanthomonadaceae     | Xanthomonas      | Unclassified |
| Pteropodidae  | 30.8523866 | 3.610840904  | 1.090269038 | 3.31188063 | 0.00092671 | 0.03054341 | Bacteria | Proteobacteria | Gammaproteobacteria   | Pseudomonadales      | Moraxellaceae        | Alkanindiges     | Unclassified |
| Pteropodidae  | 219.403137 | 3.882183276  | 1.095733525 | 3.54299945 | 0.0003956  | 0.02075755 | Bacteria | Bacteroidetes  | Flavobacteriia        | Flavobacteriales     | [Weeksellaceae]      | Chryseobacterium | Unclassified |
| Pteropodidae  | 837.095064 | 3.968944289  | 1.296094202 | 3.06223443 | 0.00219691 | 0.04557318 | Bacteria | Actinobacteria | Actinobacteria        | Actinomycetales      | Corynebacteriaceae   | Corynebacterium  | Unclassified |
| Pteropodidae  | 14.0749496 | 4.010380328  | 1.304276362 | 3.07479339 | 0.00210648 | 0.04473771 | Bacteria | Proteobacteria | Betaproteobacteria    | Burkholderiales      | Comamonadaceae       | Unclassified     | Unclassified |
| Pteropodidae  | 56.4996028 | 4.25907289   | 1.336892154 | 3.1858014  | 0.00144354 | 0.03787161 | Bacteria | Actinobacteria | Actinobacteria        | Actinomycetales      | Gordoniaceae         | Gordonia         | Unclassified |
| Pteropodidae  | 15.8728715 | 4.356749352  | 1.20558942  | 3.61379196 | 0.00030175 | 0.01922586 | Bacteria | Bacteroidetes  | [Saprosirae]          | [Saprosirales]       | Chitinophagaceae     | Unclassified     | Unclassified |
| Pteropodidae  | 178.794782 | 4.452743212  | 1.409556552 | 3.15896741 | 0.00158329 | 0.03817017 | Bacteria | Actinobacteria | Actinobacteria        | Actinomycetales      | Mycobacteriaceae     | Mycobacterium    | Unclassified |
| Pteropodidae  | 6.21886086 | 4.663028428  | 1.469938289 | 3.17226136 | 0.00151257 | 0.04473771 | Bacteria | Bacteroidetes  | [Saprosirae]          | Unclassified         | Unclassified         | Unclassified     | Unclassified |
| Pteropodidae  | 5.96221438 | 4.749096228  | 1.363012276 | 3.48426519 | 0.00049349 | 0.02264072 | Bacteria | Proteobacteria | Epsilonproteobacteria | Campylobacterales    | Campylobacteraceae   | Arcobacter       | Unclassified |
| Pteropodidae  | 20.9436783 | 4.932987454  | 1.557435665 | 3.167378   | 0.0015382  | 0.03811324 | Bacteria | Actinobacteria | Actinobacteria        | Actinomycetales      | Actinomycetaceae     | Unclassified     | Unclassified |
| Pteropodidae  | 29.9474311 | 5.001377895  | 1.606855019 | 3.11252592 | 0.00185494 | 0.0413651  | Bacteria | Proteobacteria | Gammaproteobacteria   | Enterobacteriales    | Enterobacteriaceae   | Unclassified     | Unclassified |
| Pteropodidae  | 10.2541137 | 5.014078622  | 1.385069977 | 3.62009047 | 0.0002945  | 0.01922586 | Bacteria | Proteobacteria | Gammaproteobacteria   | Pseudomonadales      | Pseudomonadaceae     | Pseudomonas      | Unclassified |
| Pteropodidae  | 3.24100976 | 5.123619144  | 1.650426241 | 3.10442177 | 0.00190651 | 0.04147829 | Bacteria | Proteobacteria | Gammaproteobacteria   | Pseudomonadales      | Moraxellaceae        | Perlucidibaca    | Unclassified |
| Pteropodidae  | 3.37516681 | 5.18178447   | 1.510624461 | 3.43022677 | 0.00060308 | 0.0233889  | Bacteria | Bacteroidetes  | Cytophagia            | Cytophagales         | Cytophagaceae        | Spirosoma        | Unclassified |
| Pteropodidae  | 4.95612079 | 5.221601557  | 1.59942147  | 4.50160516 | 6.74E-06   | 0.00104039 | Bacteria | Bacteroidetes  | [Saprosirae]          | [Saprosirales]       | Chitinophagaceae     | Chitinophaga     | Unclassified |
| Pteropodidae  | 36.3126387 | 5.658834091  | 1.377583532 | 4.10779743 | 3.99E-05   | 0.0476996  | Bacteria | Actinobacteria | Actinobacteria        | Actinomycetales      | Micrococcaceae       | Micrococcus      | Unclassified |
| Pteropodidae  | 4.87593266 | 5.711005131  | 1.671272559 | 3.41715964 | 0.00063278 | 0.02351838 | Bacteria | SR1            | Unclassified          | Unclassified         | Unclassified         | Unclassified     | Unclassified |
| Pteropodidae  | 36.6191086 | 5.804559353  | 1.291697739 | 4.4937443  | 7.00E-06   | 0.00104039 | Bacteria | Proteobacteria | Alphaproteobacteria   | Rhodobacteriales     | Rhodobacteraceae     | Paracoccus       | aminovorans  |
| Pteropodidae  | 15.5814282 | 5.859034147  | 1.441500053 | 4.06453967 | 4.81E-05   | 0.00476996 | Bacteria | Actinobacteria | Actinobacteria        | Actinomycetales      | Microbacteriaceae    | Unclassified     | Unclassified |
| Pteropodidae  | 46.66724   | 6.009936763  | 1.620417793 | 3.708881   | 0.00020818 | 0.01688128 | Bacteria | Proteobacteria | Gammaproteobacteria   | Pseudomonadales      | Moraxellaceae        | Unclassified     | Unclassified |
| Pteropodidae  | 6.52515097 | 6.131913909  | 1.715182193 | 3.57508021 | 0.00035012 | 0.02075755 | Bacteria | Firmicutes     | Clostridia            | Clostridiales        | Clostridiaceae       | Clostridium      | Unclassified |
| Pteropodidae  | 6.99054863 | 6.230715904  | 1.991565377 | 3.12855203 | 0.0017567  | 0.0412362  | Bacteria | Bacteroidetes  | Sphingobacteriia      | Sphingobacteriales   | Sphingobacteriaceae  | Unclassified     | Unclassified |
| Pteropodidae  | 12.8455406 | 6.606968105  | 1.445297111 | 4.57135634 | 4.85E-06   | 0.00104039 | Bacteria | Proteobacteria | Gammaproteobacteria   | Pseudomonadales      | Moraxellaceae        | Alkanindiges     | Unclassified |
| Pteropodidae  | 139.44463  | 7.14102869   | 1.506630904 | 4.73973332 | 2.14E-06   | 0.00063629 | Bacteria | Actinobacteria | Actinobacteria        | Actinomycetales      | Micrococcaceae       | Micrococcus      | luteus       |
| Pteropodidae  | 11.7853444 | 23.96508235  | 1.691972713 | 14.1639887 | 1.53E-45   | 1.37E-42   | Bacteria | Proteobacteria | Betaproteobacteria    | Burkholderiales      | Comamonadaceae       | Rhodoferax       | Unclassified |
| Rhinolophidae | 6.21690977 | -23.8707008  | 2.717367908 | -8.7844935 | 1.57E-18   | 1.61E-16   | Bacteria | Proteobacteria | Deltaproteobacteria   | Syntrophobacteriales | Syntrophobacteraceae | Unclassified     | Unclassified |
| Rhinolophidae | 5.44483902 | -23.68996395 | 2.90593782  | -8.1522611 | 3.57E-16   | 1.83E-14   | Bacteria | Proteobacteria | Gammaproteobacteria   | Xanthomonadales      | Xanthomonadaceae     | Dokdonella       | Unclassified |
| Rhinolophidae | 5.33513131 | -23.65059387 | 2.705098902 | -8.7429683 | 2.27E-18   | 2.09E-16   | Bacteria | Bacteroidetes  | [Saprosirae]          | [Saprosirales]       | Chitinophagaceae     | Unclassified     | Unclassified |
| Rhinolophidae | 4.69629323 | -23.4884648  | 2.695621731 | -8.7135612 | 2.94E-18   | 2.46E-16   | Bacteria | Proteobacteria | Gammaproteobacteria   | Xanthomonadales      | Xanthomonadaceae     | Lysobacter       | Unclassified |
| Rhinolophidae | 6.34244731 | -6.063086547 | 1.884632095 | -3.2171194 | 0.00129485 | 0.04075613 | Bacteria | Proteobacteria | Gammaproteobacteria   | Xanthomonadales      | Xanthomonadaceae     | Unclassified     | Unclassified |
| Rhinolophidae | 10.1070747 | -5.160488069 | 1.60780803  | -3.2096419 | 0.001329   | 0.04075613 | Bacteria | Actinobacteria | Nitriiliruptoria      | Nitriiliruptorales   | Nitriiliruptoraceae  | Unclassified     | Unclassified |
| Rhinolophidae | 52.5912353 | 4.708233337  | 1.396062002 | 3.3725102  | 0.00074486 | 0.0263567  | Bacteria | Firmicutes     | Bacilli               | Bacillales           | Bacillaceae          | Lentibacillus    | Unclassified |
| Rhinolophidae | 286.783152 | 4.793488406  | 1.121747608 | 4.27323256 | 1.93E-05   | 0.00088623 | Bacteria | Firmicutes     | Bacilli               | Bacillales           | Unclassified         | Unclassified     | Unclassified |
| Rhinolophidae | 29.0374515 | 4.948438459  | 1.493176523 | 3.31403446 | 0.0009196  | 0.03021549 | Bacteria | Proteobacteria | Gammaproteobacteria   | Pseudomonadales      | Moraxellaceae        | Acinetobacter    | Unclassified |
| Rhinolophidae | 74.9680408 | 5.175528257  | 1.379008178 | 3.75308018 | 0.00017468 | 0.00669587 | Bacteria | Actinobacteria | Actinobacteria        | Actinomycetales      | Mycobacteriaceae     | Mycobacterium    | Unclassified |
| Rhinolophidae | 7.84537579 | 5.932305883  | 1.610067389 | 3.68450782 | 0.00022915 | 0.00843254 | Bacteria | Proteobacteria | Gammaproteobacteria   | Enterobacteriales    | Enterobacteriaceae   | Unclassified     | Unclassified |
| Rhinolophidae | 30.9715879 | 6.023183129  | 1.795897484 | 3.35385688 | 0.00079694 | 0.02715485 | Bacteria | Firmicutes     | Bacilli               | Bacillales           | Bacillaceae          | Unclassified     | Unclassified |
| Rhinolophidae | 20.7504911 | 7.6085716    | 1.87930866  | 4.04860136 | 5.15E-05   | 0.00215467 | Bacteria | Actinobacteria | Actinobacteria        | Actinomycetales      | Streptomycetaceae    | Streptomycetes   | Unclassified |
| Rhinolophidae | 128.396363 | 8.116688524  | 1.731467878 | 4.68774999 | 2.76E-06   | 0.00013375 | Archaea  | Euryarchaeota  | Halobacteria          | Halobacteriales      | Halobacteriaceae     | Halobococcus     | Unclassified |
| Rhinolophidae | 226.682754 | 11.28161549  | 2.703490864 | 4.17298081 | 3.01E-05   | 0.00131709 | Bacteria | Actinobacteria | Actinobacteria        | Actinomycetales      | Nocardiopsaceae      | Unclassified     | Unclassified |
| Rhinolophidae | 384.620387 | 11.30748268  | 2.903543181 | 3.89437387 | 9.85E-05   | 0.00393811 | Bacteria | Actinobacteria | Actinobacteria        | Actinomycetales      | Nocardiopsaceae      | Nocardiopsis     | exhalans     |

|               |            |             |             |            |          |          |          |                |                     |                  |                    |               |              |
|---------------|------------|-------------|-------------|------------|----------|----------|----------|----------------|---------------------|------------------|--------------------|---------------|--------------|
| Rhinolophidae | 13.121515  | 23.36634892 | 1.952101243 | 11.9698448 | 5.11E-33 | 4.70E-30 | Bacteria | Firmicutes     | Bacilli             | Bacillales       | Bacillaceae        | Unclassified  | Unclassified |
| Rhinolophidae | 7.95472357 | 23.56150973 | 2.263836033 | 10.407781  | 2.28E-25 | 5.26E-23 | Bacteria | Firmicutes     | Bacilli             | Bacillales       | Planococcaceae     | Sporosarcina  | Unclassified |
| Rhinolophidae | 25.9764381 | 23.68310583 | 2.905014398 | 8.15249172 | 3.57E-16 | 1.83E-14 | Bacteria | Proteobacteria | Betaproteobacteria  | Burkholderiales  | Alcaligenaceae     | Pigmentiphaga | Unclassified |
| Rhinolophidae | 30.0313576 | 23.92603537 | 2.691733283 | 8.88870956 | 6.18E-19 | 7.11E-17 | Bacteria | Proteobacteria | Alphaproteobacteria | Rhizobiales      | Hyphomicrobiaceae  | Devosia       | Unclassified |
| Rhinolophidae | 10.4559986 | 23.94359103 | 2.596320604 | 9.22212418 | 2.91E-20 | 3.83E-18 | Bacteria | Firmicutes     | Bacilli             | Bacillales       | Bacillaceae        | Lentibacillus | Unclassified |
| Rhinolophidae | 11.1543769 | 24.03396481 | 2.050336281 | 11.7219624 | 9.84E-32 | 4.52E-29 | Archaea  | Euryarchaeota  | Halobacteria        | Halobacteriales  | Halobacteriaceae   | Halococcus    | Unclassified |
| Rhinolophidae | 19.2709528 | 24.79580547 | 2.876512782 | 8.62009223 | 6.69E-18 | 3.85E-16 | Bacteria | Proteobacteria | Alphaproteobacteria | Rhizobiales      | Phyllobacteriaceae | Mesorhizobium | Unclassified |
| Rhinolophidae | 20.7016756 | 24.89752797 | 2.664359714 | 9.34465712 | 9.22E-21 | 1.41E-18 | Bacteria | Bacteroidetes  | Flavobacteriia      | Flavobacteriales | Flavobacteriaceae  | Unclassified  | Unclassified |
| Rhinolophidae | 22.0885461 | 24.99090392 | 2.888308394 | 8.65243614 | 5.04E-18 | 3.37E-16 | Bacteria | Actinobacteria | Actinobacteria      | Actinomycetales  | Glycomycetaceae    | Glycomyces    | Unclassified |
| Rhinolophidae | 23.5924593 | 25.07911141 | 2.905037058 | 8.6329747  | 5.98E-18 | 3.67E-16 | Bacteria | Actinobacteria | Actinobacteria      | Actinomycetales  | Streptomycetaceae  | Streptomyces  | Unclassified |
| Rhinolophidae | 24.5114842 | 25.12952762 | 2.905027754 | 8.65035715 | 5.13E-18 | 3.37E-16 | Bacteria | Proteobacteria | Betaproteobacteria  | Burkholderiales  | Alcaligenaceae     | Unclassified  | Unclassified |
| Rhinolophidae | 69.9247038 | 25.15739443 | 2.904873199 | 8.66041053 | 4.70E-18 | 3.37E-16 | Bacteria | Actinobacteria | Actinobacteria      | Actinomycetales  | Unclassified       | Unclassified  | Unclassified |
| Rhinolophidae | 26.6336435 | 25.18897948 | 2.687384143 | 9.3730476  | 7.05E-21 | 1.30E-18 | Bacteria | Proteobacteria | Betaproteobacteria  | Burkholderiales  | Alcaligenaceae     | Unclassified  | Unclassified |
| Rhinolophidae | 27.999455  | 25.32174644 | 2.382913512 | 10.6263808 | 2.25E-26 | 6.89E-24 | Bacteria | Proteobacteria | Alphaproteobacteria | Rhodobacterales  | Rhodobacteraceae   | Unclassified  | Unclassified |
